RESEARCH ARTICLE

# Tailoring the Antibody Response to Aggregated A $\beta$ Using Novel Alzheimer-Vaccines

Markus Mandler<sup>1</sup>\*, Radmila Santic<sup>1</sup>, Petra Gruber<sup>1</sup>, Yeliz Cinar<sup>2</sup><sup>oa</sup>, Dagmar Pichler<sup>1</sup>, Susanne Aileen Funke<sup>2</sup><sup>ob</sup>, Dieter Willbold<sup>2</sup>, Achim Schneeberger<sup>1</sup>\*, Walter Schmidt<sup>1</sup>, Frank Mattner<sup>1</sup>

**1** AFFiRiS AG, Karl-Farkas-Gasse 22, A-1030, Vienna, Austria, **2** Institute for Structural Biochemistry (Institute of Complex Systems 6), Forschungszentrum Jülich, 52425, Jülich, Germany

\* These authors contributed equally to this work.

<sup>oa</sup>. Current address: Abbott GmbH & Co. KG, Max Planck Ring 2, 65205, Wiesbaden, Germany

<sup>ob</sup>. Current address: University for Applied Sciences and Arts, Faculty of Science, Bioanalytics, Friedrich-Streib-Straße 2, 96450, Coburg, Germany

\* [markus.mandler@affiris.com](mailto:markus.mandler@affiris.com) (MM); [achim.schneeberger@affiris.com](mailto:achim.schneeberger@affiris.com) (AS)

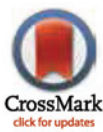

**OPEN ACCESS**

**Citation:** Mandler M, Santic R, Gruber P, Cinar Y, Pichler D, Funke SA, et al. (2015) Tailoring the Antibody Response to Aggregated A $\beta$  Using Novel Alzheimer-Vaccines. PLoS ONE 10(1): e0115237. doi:10.1371/journal.pone.0115237

**Academic Editor:** Madepalli K. Lakshmana, Torrey Pines Institute for Molecular Studies, UNITED STATES

**Received:** March 14, 2014

**Accepted:** November 20, 2014

**Published:** January 22, 2015

**Copyright:** © 2015 Mandler et al. This is an open access article distributed under the terms of the [Creative Commons Attribution License](https://creativecommons.org/licenses/by/4.0/), which permits unrestricted use, distribution, and reproduction in any medium, provided the original author and source are credited.

**Data Availability Statement:** All relevant data are within the paper and its Supporting Information files.

**Funding:** AFFiRiS AG ([www.affiris.com](http://www.affiris.com)), Vienna, and Austrian Science promotion agency ([www.ffg.at](http://www.ffg.at); Grant numbers: 807619, 809649 and 811169) provided the study funding. FFG-Funding was provided for MM, RS and PG. AFFiRiS Funding was provided to employees (MM, RS, PG, AS, FM and WS). The funders had no role in study design, data collection and analysis, decision to publish, or preparation of the manuscript.

## Abstract

Recent evidence suggests Alzheimer-Disease (AD) to be driven by aggregated A $\beta$ . Capitalizing on the mechanism of molecular mimicry and applying several selection layers, we screened peptide libraries for moieties inducing antibodies selectively reacting with A $\beta$ -aggregates. The technology identified a pool of peptide candidates; two, AFFITOPES AD01 and AD02, were assessed as vaccination antigens and compared to A $\beta$ 1-6, the targeted epitope. When conjugated to Keyhole Limpet Hemocyanin (KLH) and adjuvanted with aluminum, all three peptides induced A $\beta$ -targeting antibodies (Abs). In contrast to A $\beta$ 1-6, AD01- or AD02-induced Abs were characterized by selectivity for aggregated forms of A $\beta$  and absence of reactivity with related molecules such as Amyloid Precursor Protein (APP)/secreted APP-alpha (sAPP $\alpha$ ). Administration of AFFITOPE-vaccines to APP-transgenic mice was found to reduce their cerebral amyloid burden, the associated neuropathological alterations and to improve their cognitive functions. Thus, the AFFITOME-technology delivers vaccines capable of inducing a distinct Ab response. Their features may be beneficial to AD-patients, a hypothesis currently tested within a phase-II-study.

## Introduction

Alzheimer's disease (AD) is the most prevalent neurodegenerative disorder currently affecting 28 million people worldwide [1]. It typically presents with a characteristic amnesic dysfunction associated with other cognitive-, behavioral- and neuropsychiatric changes impairing a given individual's (social) function and ultimately resulting in its death [2]. Available treatments include three acetylcholinesterase inhibitors (AChEI) and one N-Methyl-D-aspartate

**Competing Interests:** MM, RS, PG, AS are employees of AFFIRIS. WS and FM are co-founders of AFFIRIS. YC, SAF and DW have no conflict of interest. The authors can confirm that this does not alter their adherence to all the PLOS ONE policies on sharing data and materials. The authors note that one or more of the authors are employed by a commercial company "Abbott GmbH". The authors can confirm that this does not alter the adherence of Dr.Cinar to all the PLOS ONE policies on sharing data and materials. All work presented in this study has been performed before Dr. Cinar was joining Abbott. At that time she was still a member of the group of Prof. Willbold and Prof. Funke at Forschungszentrum Jülich. The scientists involved in this study did not have any affiliation with Abbott and Abbot is not having any influence on the results shown in this report.

(NMDA) antagonist. Their effects are small and only symptomatic in nature [3]. Thus, there is a high medical need for a disease-modifying drug.

Accumulation of Amyloid Beta (A $\beta$ ) appears to be an early event and central to the disease process. A $\beta$  is a proteolytic fragment of the amyloid precursor protein (APP) [4, 5, 6]. APP-cleavage results in several peptides including A $\beta$ 1-40 and A $\beta$ 1-42, which are subject to further processing. Recent studies suggest A $\beta$ -variants and aggregates drive the disease process [7, 8].

Immunotherapy offers the possibility to specifically address A $\beta$ -variants and aggregates. However, targeting self-proteins by immunological means bears the risk of autoimmunity [9]. This is exemplified by autoimmune reactions following the administration of cancer vaccines [10]. While regarded as immune privileged, the brain is not excluded from such reactions but represents a relevant target organ as experienced with AN1792 [11] or deduced from the existence of paraneoplastic autoimmune Central Nervous System (CNS) syndromes [12].

With regard to pathological autoimmunity, both cellular- and humoral effector mechanisms need to be considered. Avoidance of T-cell responses against CNS-targets is crucial as demonstrated by AN1792-triggered cases of meningoencephalitis. All second generation AD-vaccines in clinical development, are designed to avoid activation of target-specific T-cells by restricting antigen length to <8 amino acids (aa) or by excluding bona-fide T-cells epitopes (CAD106, ACC001, UB-311, ACI-24 [13, 14, 15]).

The risk of pathological humoral autoimmunity is primarily related to the antigenic epitopes addressed. Efficient control of this risk requires selective targeting of structures exclusively expressed in disease, so called neo-epitopes. The free N-terminus of native, aggregated A $\beta$  is an excellent example of a neo-epitope. Exclusive reactivity to this structure would preclude antibodies (Abs) induced to cross-react with APP and related molecules such as secreted APP-alpha (sAPP $\alpha$ ).

Conventional A $\beta$ -vaccines [13, 14, 15, 16] are conjugates of an N-terminal A $\beta$ -fragment and a carrier. The N-terminus of A $\beta$  is accessible in monomers, aggregates and amyloid plaques. Abs elicited by conventional conjugate-vaccines typically fail to discriminate between the various A $\beta$ -aggregation states. Given the fact that A $\beta$ -monomers possess physiological functions [17, 18, 19, 20] while aggregates exert neurotoxic and synaptotoxic effects [21, 22, 23, 24], a potential benefit of vaccines may require them to elicit Abs selectively addressing A $\beta$ -aggregates.

To generate a vaccine that integrates both, targeting the A $\beta$ -N-terminus and selective recognition of A $\beta$ -aggregates, we devised a technology based on mechanisms of molecular mimicry. Peptide libraries were screened for peptides exhibiting both features. This yielded several hits. Two of them, AD01 and AD02, were characterized in more detail. Both did exhibit the intended specificity, and were found to reduce pathological alterations and to ameliorate behavioral deficits of APP-transgenic Tg2576-mice. Results obtained not only suggested them to be disease-modifying but to have a safety profile superior to conventional A $\beta$ 1-6-based vaccines.

## Material and Methods

### AFFITOPE identification and vaccine formulation

AFFITOPE-peptides were identified by screening of peptide libraries (phage display: New England BioLabs, USA; randomized synthetic hexa- and hepta-peptide libraries: Mimotopes Pty., France or MULTIPIN peptide technology), with monoclonal antibodies (mAbs, AFFIRIS, Austria) specific for the free N-terminus of A $\beta$ 1-40/42. Identified peptides (EMC microcollections, Germany) were conjugated to KLH (Biosyn, Germany) using N-gamma-Maleimidobutyryloxysuccinimide ester (GMBS, Thermo Scientific, USA) and adsorbed to Aluminum-hydroxide (ALUM, Brenntag, Denmark). 30 $\mu$ g peptide/vaccine-dose containing 0.1% ALUM were applied to animals.

## Animal experiments

All animal experiments were performed in accordance with the Austrian Animal Experiments Act (TVG2012) using 8–12 week old female C57Bl/6 mice (Charles River, Germany), or Tg2576-mice (Taconic Farms, USA; 129S6/SvEvTac). Experiments were performed under approval numbers: LF1-TVG-22/004-2007; M58/007052/2011/7 and LF1-TVG-22/0102011. General health was checked by modified Smith Kline Beecham, Harwell, Imperial College, Royal London Hospital, phenotype assessment (SHIRPA) primary observational screen [25]. Mice were injected s.c. 3–6 times in monthly or biweekly intervals. Blood was taken in regular intervals, plasma prepared and stored until further use. At study end mice were sacrificed, cerebrospinal fluid (CSF), brains were collected and hemispheres separated. One hemisphere was fixed in 4% Paraformaldehyde (PFA, Sigma Aldrich, USA), dehydrated and paraffin-embedded. Brain tissue was sectioned at 7 $\mu$ M using a sliding microtome (Leitz, Germany) and sections were mounted on Superfrost Plus Slides (Menzel, Germany). The second hemisphere was quick-frozen at -80°C until further extraction.

## Titer determination by ELISA

Standard enzyme-linked immunosorbent assay (ELISA) technology was used to measure levels of vaccine-induced antibodies in plasma and CSF [26]. Substrates used included murine (Anaspec, USA) and human (BACHEM, CH) A $\beta$ 1-40/42 (each at 5 $\mu$ g/ml), KLH (1 $\mu$ g/ml), recombinant sAPPa (1 $\mu$ g/ml, Sigma-Aldrich, USA), peptide-Bovine serum albumin (BSA) conjugates (1 $\mu$ M), or A $\beta$ -aggregates (5 $\mu$ g/ml, immobilized via Streptavidin). Optical density (OD) was measured at 405nm using a micro-well reader (Tecan, CH). OD<sub>max</sub>/2 was calculated. For determination of antibody selectivity for different A $\beta$  species (monomers, oligomers and fibrils), relative units were calculated as the ratio of OD values for individual measurements: e.g. OD<sub>405nm</sub> of Oligomer-specific ELISA signals and OD<sub>405nm</sub> of Monomer-specific ELISA signals. Abs 3A5 (AFFiRiS, Austria), mAbP2-1 (Life-Technologies, USA) and 6E10 (Covance, USA) served as positive controls.

**Preparation and characterisation of A $\beta$ -monomers,-oligomers and—fibrils** Preparation of A $\beta$ -mono and oligomers (<100kd) was performed according to Johansson et al. with slight modifications [27]. Pure C-terminally biotinylated A $\beta$ 1-42 was used to prepare seedless A $\beta$ -monomers. A 1/10 mix of biotinylated and unmodified A $\beta$ 1-42 (Anaspec, USA) was used for oligomer- and fibril-production. For preparation of A $\beta$ -mono and oligomers A $\beta$  was first resolved in Hexafluoro-2-propanol (HFIP) over night and subsequently removed by vacuum centrifugation. A $\beta$  peptides were then resuspended and separated using a Superdex 75-10/300 column (GE Healthcare, UK). Elution of monomers and oligomers was determined by detection at 214nm with oligomers eluting at 8 ml and monomers at 14,5 ml, respectively. Column calibration was done according to manufacturers protocol (LMW Gel Filtration Calibration Kit; GE Healthcare, UK). For fibril preparation A $\beta$  peptides were resuspended in 1xPBS and fibrils were assembled by constant rotation of peptide solutions for 24h at 350rpm (37°C). Fibril-preparations were then centrifuged and the pellet was resuspended in elution buffer used for gelfiltration. Aggregation of A $\beta$ -species was confirmed by Thioflavin-T, Western- and Dot blot analysis (see [Appendix](#)).

## APP-FACS analysis

To test for APP-specific antibodies a Fluorescence-activated cell sorting (FACS) assay based on Chinese hamster ovary (CHO)-cells stably expressing a fusion protein of human APP and enhanced green fluorescent protein (eGFP) (APP-751-EGFP in pCMV-Sport 6, APP: NP\_958816, pCMV-Sport 6 eGFP-FLAG-tagged (Gift from J.M.Peters, IMP, Austria)) was

used. A mixture of transfected and un-transfected CHO-cells (50% each) was exposed to diluted plasma and analysed for double positive cells (eGFP and APP) with a FACScan (BD Biosciences, USA). mAbP2-1 served as positive control. For each sample 10,000 events were acquired and analysed using CellQuest software (BD Biosciences).

## Behavioral tests

To analyse cognitive dysfunction immunised Tg2576 animals were subjected to Modified Morris water maze task (MWM, with changes) [28] and contextual fear conditioning (CFC, with changes) [29], both analyzed using AnyMaze software (Stoelting Co, USA). MWM was subdivided into cued-, hidden task, and probe-trial. Animals were trained in a tap-water filled 110-cm pool, allowed to swim for 60s with platform occupancy for 10s prior to the next trial. 24h after the hidden training, memory retention was determined in a single 60s probe-trial without a platform. The percent of distance swam and time spent in each quadrant was determined. For CFC, on day 1 mice were placed in the conditioning chamber (AFFiRiS), allowed to habituate for 2 min. and received three 0.8mA foot-shocks in 2 min intervals plus 30s rest. To assess contextual learning on day 2, animals were readmitted to the chamber and monitored for 5 min. with s120-240 chosen as time frame for analysis (time freezing = lack of movement except for respiration). The first two minutes of day 1 were considered as baseline-freezing which was subtracted from day 2 values. Cognitive testing was initiated 4 weeks prior to sacrifice with 4 weeks required to complete both cognitive tests for the individual animals including habituation phases at the site of testing.

## Immunohistochemistry (IHC), immunofluorescence (IF) and analysis of cerebral A $\beta$

IHC/IF analysis was done as described previously [26]. Reactivity of vaccine-induced antibodies to A $\beta$  and APP was determined using an adapted Tissue Amyloid Plaque Immunoreactivity (TAPIR) analysis [30] on untreated Tg2576- and human AD-brain sections (n = 4, obtained from Novagen, USA (n = 1) or the UCSD ADRC Brain Bank (n = 3); patients analysed were n = 3 female and n = 1 male; females: Braak stage VI and male patient Braak stage V) using plasma samples and an APP-specific mAb (22C11, EMD Millipore, USA) as control. Competition experiments of AD01- and AD02 induced antibodies were performed using specific AFFI-TOPE-peptides at a final concentration of 10 $\mu$ M. Control antibody used for amyloid staining on human brain sections was the monoclonal antibody BAM10 (Sigma, USA). For murine sections monoclonal antibody 6E10 (Signet, USA) was used as control antibody.

For A $\beta$ -specific IF-staining, brain sections of immunized Tg2576 were processed for analysis of amyloid load and incidence of amyloid bearing vessels using mAb 3A5 (AFFiRiS AG, Austria) [26]. All secondary reagents used were obtained from Vector Labs (USA). For TAPIR analysis, color reactions were performed using DAB-substrate Kit. For IF, sections were mounted and counterstained using DAPI-containing VECTASHIELD-HardSet Mounting Medium. Sections were examined using MIRAX-SCAN (Carl Zeiss AG, Germany). AD-like pathology in animals was assessed by determining the total tissue area of coronal cross sections of the total brain as well as the 3A5 positive area on the respective brain sections were determined and the relative cerebral area occupied by amyloid deposits was calculated using a semi-automated area recognition program (eDefiniens Architect XD; [www.definiens.com](http://www.definiens.com)). For analysis three slides/animal and  $\leq$  five individual sections/slide were assessed. Sections carrying tissue artifacts or aberrant staining were excluded. To assess the number of A $\beta$ -positive vessels, 3A5 stained sections (n = 3 slides/animal covering cortex and hippocampus and up to five individual sections per slide) have been analysed. A $\beta$ -positive vessels were manually counted in sub-

regions of the cortex as well as in the hippocampus. Number of positive vessels per mm<sup>2</sup> was determined.

### Analysis of micro-hemorrhaging

To assess the number of micro-hemorrhages, sections were stained using the Iron Stain Kit (Sigma Aldrich, USA) according to manufacturer's protocol. 3 slides/animal covering cortex and hippocampus and up to five individual sections per slide have been analysed. Prussian blue-positive spots were manually counted in sub-regions of the cortex as well as in the hippocampus. Number of positive spots per animal was determined.

### Analysis of cerebral levels of A $\beta$ by ELISA

The frozen brain hemispheres were thawed and homogenized in homogenisation buffer (50mM HEPES (pH 7,3), 5mM EDTA, with proteinase inhibitor cocktail: Complete Mini, Roche, CH) and centrifugated at 4°C for 30 minutes at 40.000 rpm. The supernatant was aliquoted and stored at -80°C as soluble fraction. The pellet was re-homogenized in Guanidine-HCl buffer (5M Guanidine-HCl, 50mM HEPES (pH 7,3), 5mM EDTA with proteinase inhibitor cocktail: Complete Mini, Roche, CH) and centrifuged at 1600g. The supernatant was dialysed against PBS, aliquoted and stored at -80°C as insoluble fraction. Fractions were analysed for protein content using the Quick Start Bradford Protein Assay according to manufacturer's protocol (BioRad, USA).

For quantification of A $\beta$ 40 and A $\beta$ 42 peptides in soluble and insoluble fractions, an ELISA analysis was used (Human Amyloid Beta 40 and Human Amyloid Beta 42 ELISA kits, EMD-Milipore, USA), The concentration of amyloid peptides in ng/mg of total protein was calculated for A $\beta$ 40 and A $\beta$ 42 in both fractions (soluble and insoluble).

### ELISPOT analysis

Animals (C57Bl/6 mice) were immunized three times in biweekly intervals with AD01-conjugate (30 $\mu$ g net peptide content/mouse/immunization), AD02-conjugate (30 $\mu$ g net peptide content/mouse/immunization) or Ovalbumin (100 $\mu$ g/mouse/immunisation), adjuvanted with CpG/polyR as adjuvant for T-cell stimulation (CpG (ODN1668: 5' TCC ATG ACG TTC CTG ATG CT 3', Invivogen, San Diego, USA) 32  $\mu$ g/mouse; polyR 100  $\mu$ g/mouse; Sigma-Aldrich). 1 week after the final immunization animals were sacrificed, splenocytes isolated and analysed for the presence of target specific T-cells by ELISPOT analysis. ELISPOT analysis was performed using Ready-SET-Go kits obtained from eBioscience (San Diego, USA) according to the manufacturer's protocol. Full length A $\beta$ 1-42 (50 $\mu$ g/ml), carrier (KLH, 50 $\mu$ g/ml) or short MHC-I or MHC-II restricted Ovalbumin-derived peptides Ova 244 (TEWTSSNVMEERKIKV; MHC class II restricted; 10 $\mu$ g/ml) and Ova 245 (SIINFEKL; MHC class I restricted; 10 $\mu$ g/ml) as positive control for T-cell induction were used for splenocyte restimulation. Stimulated cells were assayed for the secretion of either Interleukin 4 (IL4) or Interferon gamma (IFN $\gamma$ ). The stimulation was controlled by application of two positive control stimulators, for IL4 secretion, Phorbol-12-Myristate-13-Acetate (PMA, working conc.: 20nM) and ionomycin (working conc.:750nM) and for IFN $\gamma$  secretion Concanavalin A (ConA); working conc.:10  $\mu$ g/ml;) were used, respectively.

### Statistical analysis

All experiments were done blind-coded. To determine statistical significance, values were compared using (i) one-way analysis of variance for unpaired samples with Tukey's Multiple



Comparison Tests, (ii) unpaired T-tests with Welch correction or (iii) Kruskal-Wallis-H-Test with Dunn's Multiple Comparison Tests. For correlation analysis a Spearman-Rank-Correlation has been calculated.

## Results

To generate an A $\beta$ -vaccine not activating A $\beta$ -specific T-cells but inducing Abs selectively recognizing aggregated A $\beta$  and at the same time being specific for the A $\beta$ -N-terminus, we screened peptide libraries with Abs applying various selection filters. Specifically, mAbs directed against the N-terminus of intact, full length A $\beta$ 1-40/42; (aa1-6: DAEFHR) were used to screen  $10^9$  peptides from different hexa- and hepta-peptide libraries for 6–7 mer peptides for binding. Specificity of peptide hits was assessed by competition with A $\beta$ 1-6 (DAEFRH). Several rounds of selection yielded 68 candidates fulfilling both of the above criteria. Comparing the sequence of the  $n = 68$  peptides to the one of native A $\beta$  revealed no candidate with only 1aa exchange and a difference of  $n = 2aa$  in 16%,  $n = 3aa$  in 31%,  $n = 4aa$  in 23.5% or  $n = 5aa$  in 9%. The remaining 20.5% of the peptides differed at all positions. As a next step, out of the 68 candidates, 17 were randomly picked and tested for their ability to elicit antibodies reacting to the peptides used for immunization (=immunizing peptide) and, at the same time, A $\beta$ . To this end, they were coupled to KLH, which served as carrier, adsorbed to aluminum (ALUM), the adjuvant used, and subcutaneously injected into C57BL/6 and Tg2576-mice. While all 17 induced Ig-Abs reactive with the respective peptide, only 14 elicited Abs recognizing A $\beta$ 1-10 coupled to BSA. Those conjugates were used to mimick binding to A $\beta$ -aggregates, as peptide-BSA conjugates should show a local enrichment of A $\beta$ -N-termini probably similar to the situation present in full length, native A $\beta$ -aggregates. Two examples, AD01 and AD02, characterized by a difference of 50% in their amino acid sequence compared to the targeted A $\beta$  epitope, were characterized in more detail and compared to A $\beta$ 1-6-KLH-vaccine.

### Immunogenicity of AD-AFFITOPEs

To test the immunogenicity of AD01 and AD02 in comparison to A $\beta$ 1-6, Tg2576-mice were injected 6x, s.c., at 4-week intervals with either conjugate-vaccine containing 30 $\mu$ g net peptide. Vaccination induced Abs were measured in plasma samples at defined time points after immunization (AD01 ( $n = 9$ ), AD02 ( $n = 8$ ) and A $\beta$ 1-6 conjugate ( $n = 9$ )). All 3 elicited strong and comparable IgG titers towards the peptide used for immunization (Fig 1A). Both AFFITOPEs, AD01 and AD02, elicited Abs to the N-terminus of human A $\beta$  at levels comparable to the A $\beta$ 1-6-KLH conjugate-vaccine (Fig 1B). Of note, the IgG responses triggered by the 3 conjugate-vaccines followed the same kinetics (Fig 1C). Titers reached a plateau after 2 immunizations, which was stable during the treatment period. Analyzing the CSF of AD02-immunized Tg2576-mice demonstrated the presence of peptide-/A $\beta$ -specific Abs at a level of 0.1–0.7% (0.31% +/- 0.05%) of the respective plasma levels (Fig 1D).

### Specificity of the AFFITOPE induced antibody response

We next assessed the specificity of the Abs induced in more detail. Neither AD01-, AD02- nor A $\beta$ 1-6-induced plasma samples reacted with irrelevant control peptides such as A $\beta$ 11-20 offered as BSA conjugates (ELISA, not shown). The reactivity of AD01- and AD02-induced Abs towards murine A $\beta$  was limited and comparable, whereas the signal obtained with A $\beta$ 1-6-induced sera was 4 times higher (Fig 1E). Interestingly, while AD01-elicited plasma samples reacted strongly with AD01 offered as BSA conjugate in an ELISA setting they barely did so with AD02-BSA; the opposite was true for AD02-induced samples (approx. 13-fold difference,

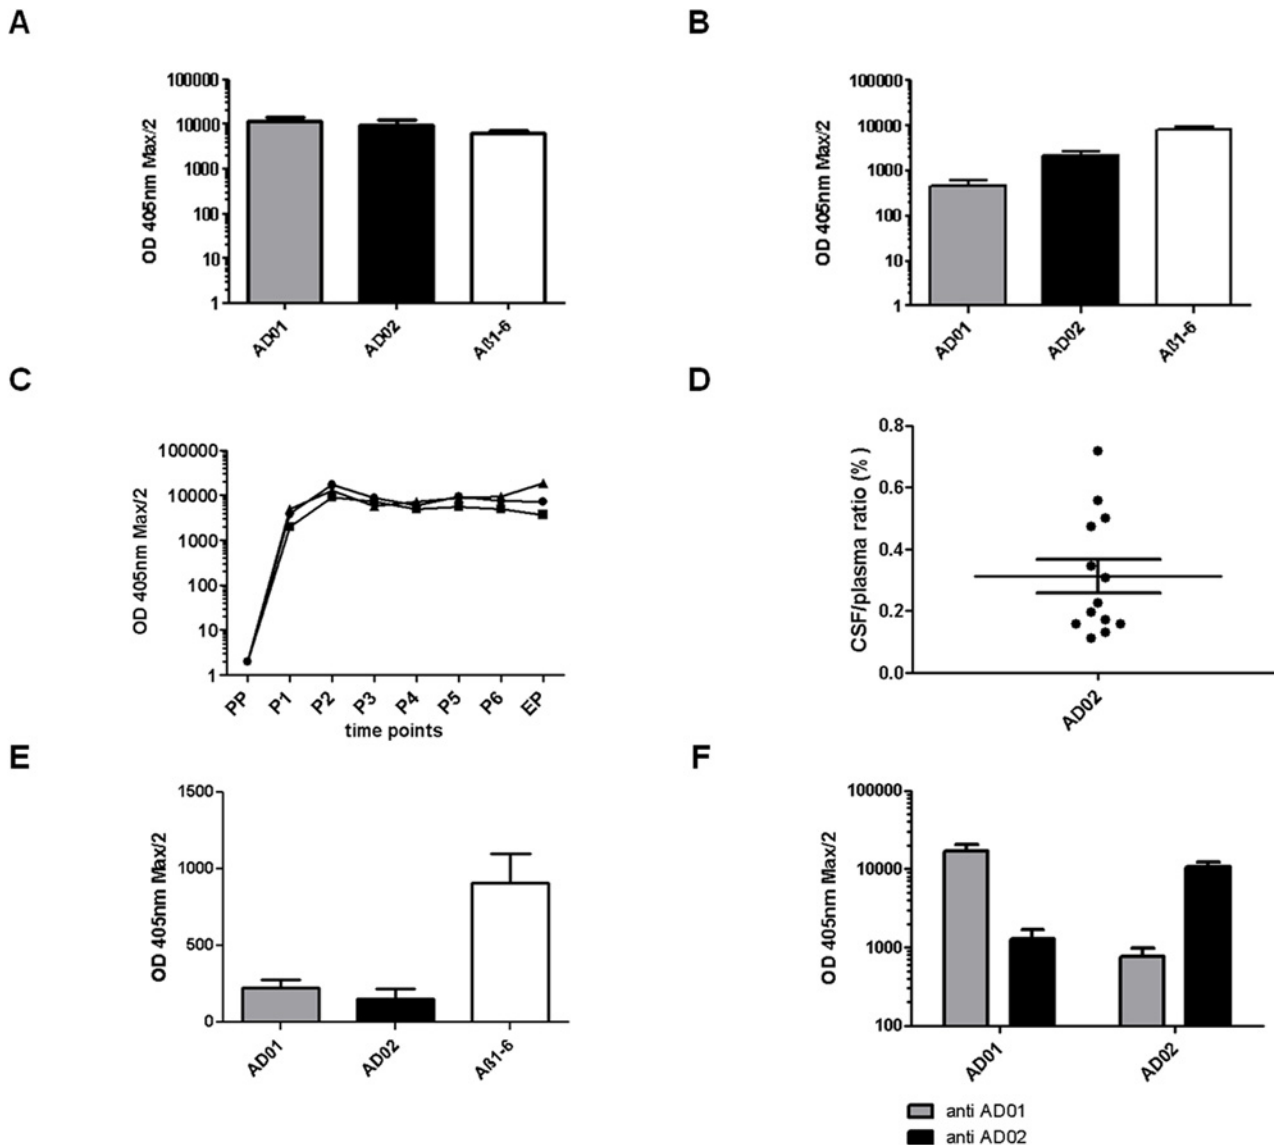

**Figure 1. Analysis of the immune response following injection of AD01, AD02 and A $\beta$ 1-6 conjugate vaccines.** Mice were s.c. injected 6 times at a 4-week interval with AD01 (n = 9), AD02 (n = 8) and A $\beta$ 1-6 conjugate (n = 9) adsorbed to aluminum hydroxide (ALUM). Plasma was taken in monthly intervals and at sacrifice. Samples were analyzed for their concentration of IgG Abs against specific peptides. Values depicted are the titer calculated as OD max/2 (at 405nm) plus SEM unless otherwise stated. A) IgG response towards the respective immunizing peptide (AD01: anti AD01; AD02: anti AD02, A $\beta$ 1-6: anti A $\beta$ 1-6); B) Reactivity towards human A $\beta$ 1-10 after immunization with AD01-, AD02- and A $\beta$ 1-6-based conjugate vaccines. Note, none of the 3 vaccines elicits Abs that would react with the A $\beta$ 11-19, used as a specificity control (not shown); C) Kinetics of the IgG responses to the immunizing peptide following vaccination with AD01-, AD02- or A $\beta$ 1-6 conjugates (AD01... black circle, AD02... black quadrat, A $\beta$ 1-6... black triangle); D) Ratio of AD02-induced peptide-specific IgG in CSF and plasma. Analysis of AD02-specific IgG levels in CSF and plasma in 13 AD02-immunized animals revealed an average ratio of 0.31% (+/- 0.05%). E) Analysis of sera from vaccinated animals regarding their reactivity towards murine A $\beta$ 1-42. Only A $\beta$ 1-6 immunized animals show a relevant cross-reactivity to murine A $\beta$ 1-42 (A $\beta$ 1-6 (n = 9) vs. AD01 (n = 10); p<0.05 and A $\beta$ 1-6 (n = 9) vs. AD02 (n = 28); p<0.01); F) IgG response towards the respective immunizing peptide (AD01: anti AD01; AD02: anti AD02) compared to the respective other AFFITOPE peptide (AD01: anti AD02; AD02: anti AD01). Animals included: n = 9 for AD01, n = 8 for AD02.

doi:10.1371/journal.pone.0115237.g001

see Fig. 1F). This lacking reactivity towards the respectively other AFFITOPE while retaining reactivity towards the A $\beta$ -N-terminus is most probably explained by the fact that the amino acid sequences of the two AFFITOPES tested in this experiment differ from each other by 67% (n = 4/6aa) but show a similar difference to the native A $\beta$  sequence of 50% (n = 3/6aa).

## Exclusion of APP reactivity

Abs used to identify the AD01/AD02 AFFITOPE-family were characterized by recognition of the A $\beta$ -N-terminus and a lack of reactivity with full length APP, the precursor of A $\beta$ . To check whether, as intended, AD01- and AD02-induced Abs would mirror this characteristic of the paternal mAbs, plasma of AFFITOPE-vaccinated animals were analyzed for APP-binding employing a FACS assay based on CHO-cells expressing human APP on their surface. Plasma of immunized animals were analyzed in comparison to APP-specific mAbP2-1, which showed a dose dependent signal (Fig. 2A-C). Of note, such a signal was not seen in plasma from AD01 (n = 8) or AD02 immunized animals (n = 30; representative example in Fig. 2E and data not shown). By contrast, a substantial portion of plasma from A $\beta$ 1-6-immunized animals, n = 6/30, was found to contain APP-specific Abs (Fig. 2F).

In addition, plasma samples were also tested for Abs directed against sAPPA, an important mediator of APP-function. None of the AFFITOPE samples tested (n = 20; Fig. 2G) contained sAPPA specific Abs detectable by ELISA. This differentiated them from A $\beta$ 1-6-based vaccines, which induced sAPPA-reactive Abs in all animals tested (n = 10/10; Fig. 2G). Interestingly, this APP cross-reactivity was not directly correlated with the absolute anti-A $\beta$  titer in these samples (Spearman-Rank-Correlation  $r = 0.4316$ ,  $p = 0.2129$ ; Fig. 2H), implying that this reactivity against cleaved forms of APP is a unique feature of a fraction of Abs present within the oligoclonal response elicited by A $\beta$ 1-6-based vaccines.

As a third method to assess the potential cross reactivity of AD01- and AD02-induced antibodies to human APP/sAPPA and an APP-eGFP fusion protein, a Western blot analysis was performed (see Appendix, S2A Fig.). In this assay, both AD01- and AD02 induced plasma samples failed to detect full length human APP/sAPPA in brain extracts from 12 month old Tg2576 animals or in cell extracts from CHO cells stably expressing a fusion protein of human APP and eGFP (also used in the FACS based analysis mentioned above). As expected the APP specific positive control antibody 22C11 was able to detect APP/sAPPA and APP-eGFP using this method.

## Differential reactivity towards A $\beta$ -aggregation states

To characterize AD01- and AD02-induced plasma samples with regard to their reactivity towards defined A $\beta$ -aggregation states we devised ELISA systems covering monomers, oligomers and fibrils. 6E10, known to bind A $\beta$  in all its aggregation states (Fig 3), was used as standard. Of note, the patterns of reactivity seen with AD01, AD02 and A $\beta$ 1-6 were found to differ substantially. A $\beta$ 1-6-induced antibodies behaved like 6E10 reacting equally well with all A $\beta$ -aggregation states tested (Fig. 3). By contrast, AFFITOPE-elicited Abs exhibited a differential recognition pattern of the various A $\beta$ -aggregation states. AD01-induced plasma reacted with aggregated (both oligomers and fibrils) but not with monomeric A $\beta$ . AD02-induced sera were found to recognize fibrillar A $\beta$  only (Fig. 3) and showed only limited reactivity towards oligomeric A $\beta$  preparations and no reactivity with monomeric A $\beta$  using ELISA based analyses.

In a second set of experiments, A $\beta$  aggregate specificity of AD01 and AD02 induced antibodies was analysed employing peptide ELISAs with aggregated A $\beta$  both as bait coated on the ELISA plate and as peptide used as competitor for antibody binding to the immobilized A $\beta$  aggregates (see Appendix, S2C Fig.). Indeed this competition experiment revealed a concentration dependent, specific reduction of the binding to aggregates and hence further substantiates the claim of selective aggregate recognition by AFFITOPE induced antibodies.

In addition, AD01 and AD02 induced antibodies were also tested for binding to monomeric, dimeric and aggregated A $\beta$  by Western blot analyses. As suggested by ELISA results (see



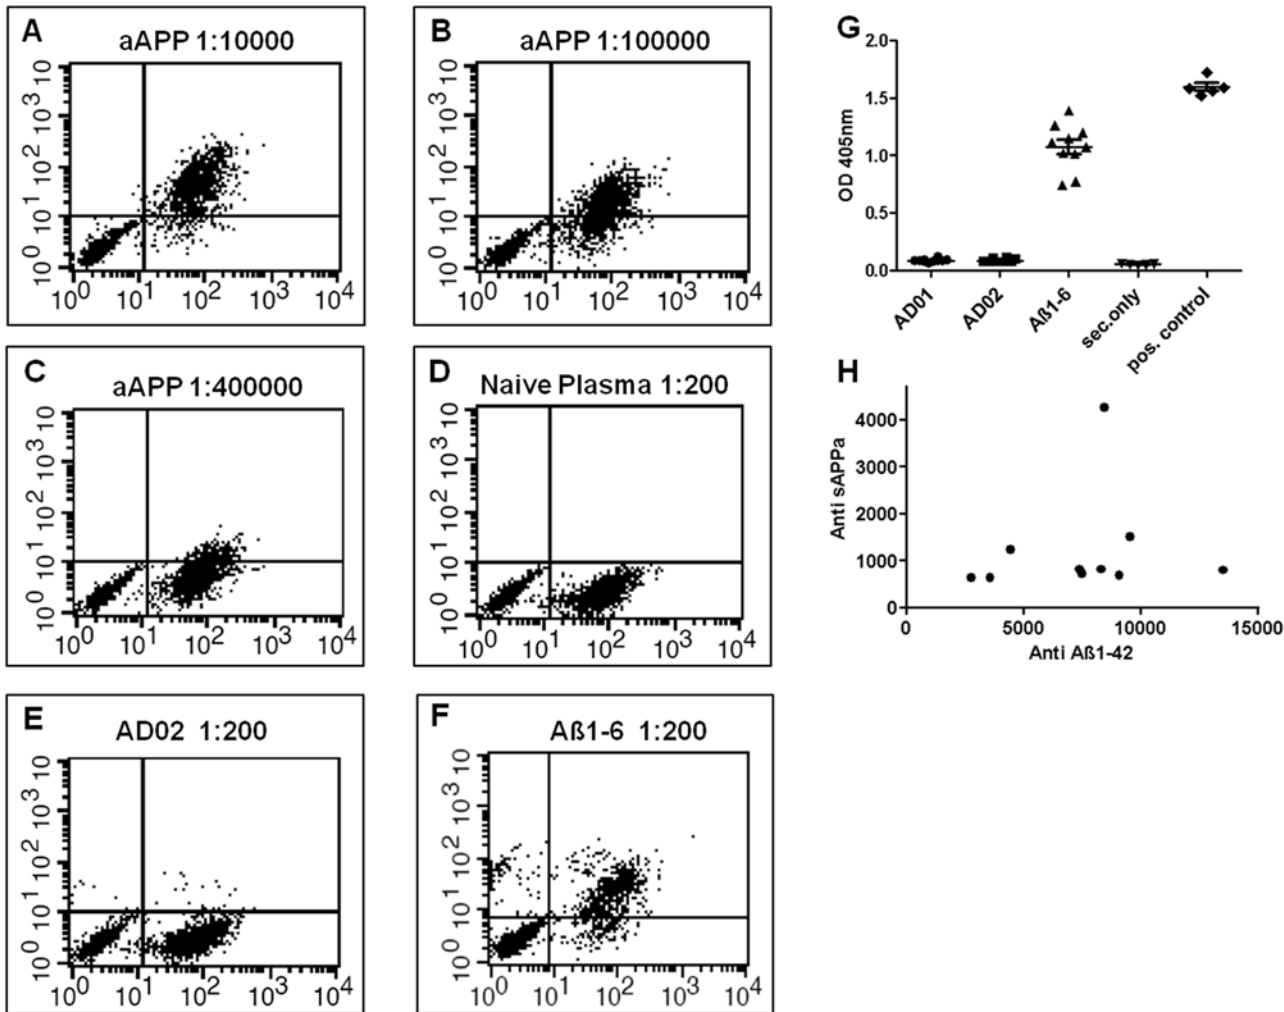

**Figure 2. AFFITOPE induced antibodies spare APP and sAPPa.** Mice were s.c. injected 3 times at a 2-week interval with AD01-, AD02- or Aβ1-6-conjugate vaccines adjuvanted with ALUM. Plasma was taken at sacrifice. A-D depict controls for full length APP-specific FACS analysis using the APP-specific mAb mP2-1 (A-C) or naive plasma (D); E and F show two exemplaric analyses of AD02 and Aβ1-6 induced plasma in this assay. G and H depict analysis of immune responses against sAPPa following vaccination (n = 10 animals/treatment group) by peptide ELISA. For analysis of the presence of APP specific antibodies, the % of cells shifting in the non-APP expressing population and the % of cells shifting in the presence of the secondary antibody only were subtracted from the % of APP-positive cells shifting as indicator of APP binding. The assay threshold was set to 5%. Positive controls (A-C) show an Ab dose dependent (LOD of ≤1ng/ml mAb) shift of the APP positive but not of the APP-negative population. No reactivity was seen with plasma from naive animals (D). AD02-induced samples show no reactivity to the APP-positive as well as APP-negative populations (E) whereas Aβ1-6 induced sera show a specific shift at a dilution of 1/200 in the APP-positive cell population (upper right quadrant) with only very limited reactivity to the non-APP expressing cell population (lower and upper left quadrant; F). Neither AD01 nor AD02 was found to elicit sAPPa-specific Abs (G). On the contrary, following Aβ1-6 immunization, sera of all 10 animals were shown to cross-react with sAPPa (G). A correlation analysis for anti Aβ1-42 and anti sAPPa reactivity of plasma samples from animals undergoing Aβ1-6 immunization (H) fails to detect a significant correlation indicating a highly individual response against sAPPa (Pearson  $r = 0.1534$ ;  $R^2 = 0.02354$ ); Titers determined were calculated based on ODmax/2 values. aAPP...anti APP specific Ab, neg.contr... is secondary Ab only; AD01, AD02 is AD01- and AD02-vaccine induced plasma, Aβ1-6 is Aβ1-6 vaccine induced plasma, sec.only... secondary Ab only, pos. control... mAb P2-1

doi:10.1371/journal.pone.0115237.g002

Fig. 3), AD02 induced antibodies showed a lack of reactivity to monomeric and dimeric Aβ and against low molecular weight (MW) Aβ aggregates (<100kD). Reactivity could only be detected to high MW aggregates (>100kd, see Appendix, S2B Fig.). In contrast to ELISA based results, AD01 induced antibodies displayed reactivity to monomeric and dimeric Aβ probably due to different sensitivity of the assays used. In line with previous results (see Fig. 3 and

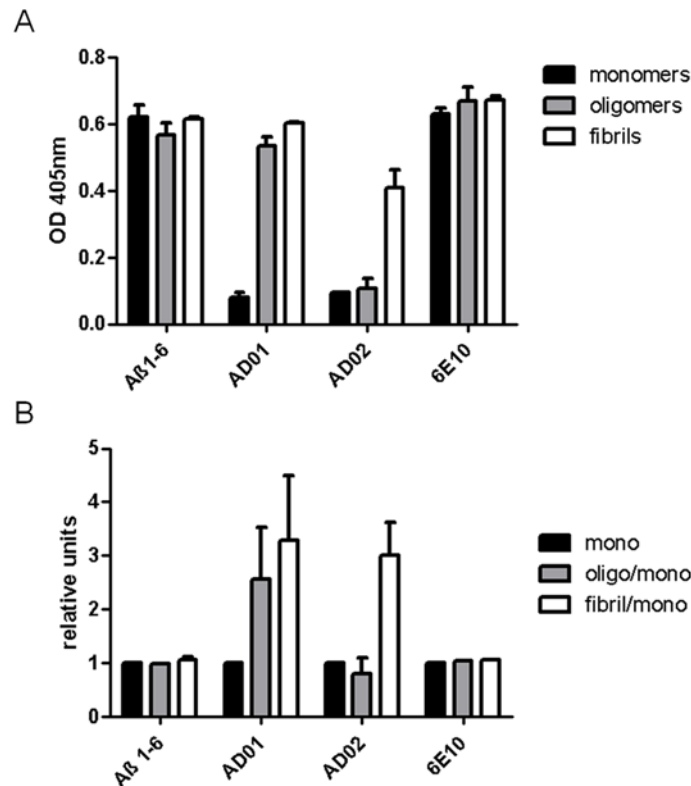

**Figure 3. AFFITOPE induced antibodies differ in their reactivity towards aggregated forms of A $\beta$ .** A) Reactivity of A $\beta$ 1-6-, AD01- and AD02-induced Abs towards A $\beta$  in various aggregation states. Bars represent the means of OD values (at 405nm) of individual plasma samples (duplicates) derived from single animals immunized with A $\beta$ 1-6, AD01 or AD02. B) Relative units of values from monomeric- and either oligomeric- or fibrillar A $\beta$  detection by plasma samples from A $\beta$ 1-6- or AFFITOPE-treated animals are depicted (mean  $\pm$  SEM, n = 5 samples/vaccine). Levels around one indicate a similar OD whereas values above one indicate a predominant binding to either oligomers or fibrils as compared to monomeric A $\beta$ 1-42. Reactivity of sera was tested against seedless monomeric, oligomeric and fibrillar A $\beta$ 1-42, respectively. Purity of the preparations was comparable and exceeded 90%. The monoclonal Ab 6E10 (Signet) was used as positive control.

doi:10.1371/journal.pone.0115237.g003

Appendix, S2B Fig.) they also reacted against all aggregated A $\beta$  forms present on Western blots similar to the non-conformer specific control antibody 4G8 (see Appendix; S2B Fig.).

Furthermore, we assessed the reactivity of AD01- and AD02-induced plasma on brain tissue of Tg2576-mice and of AD-patients (n = 4) applying a standard DAB immuno-histochemical protocol [26] and using 22C11 as comparator reacting with full length APP. AD01- or AD02-elicited plasma were found to exclusively stain amyloid deposits and to spare neuronal surfaces with a comparable staining pattern as the A $\beta$  specific control antibody 6E10 in brain sections of Tg2576-mice (Fig. 4 A, B, D, E, J and K). In addition, a loss of immunoreactivity could be detected when AD01- or AD02-elicited plasma was pre-adsorbed with the respective AFFITOPE-peptides to inhibit antibody binding to amyloid plaques, indicating specificity of the AFFITOPE-induced antibody staining observed in these animals (Fig. 4G, H). Immunohistochemical analysis of APP reactivity showed an opposite staining pattern with specific reactivity on neuronal cell walls and plaque-surrounding neuritic alterations both in the hippocampus and the cortex of Tg2576 mice (Fig. 4M and data not shown)

A comparable staining pattern was seen on human AD-brain sections. The analysis of human sections of n = 4 patients revealed a specific amyloid deposit staining of AD01- (Fig. 4F)

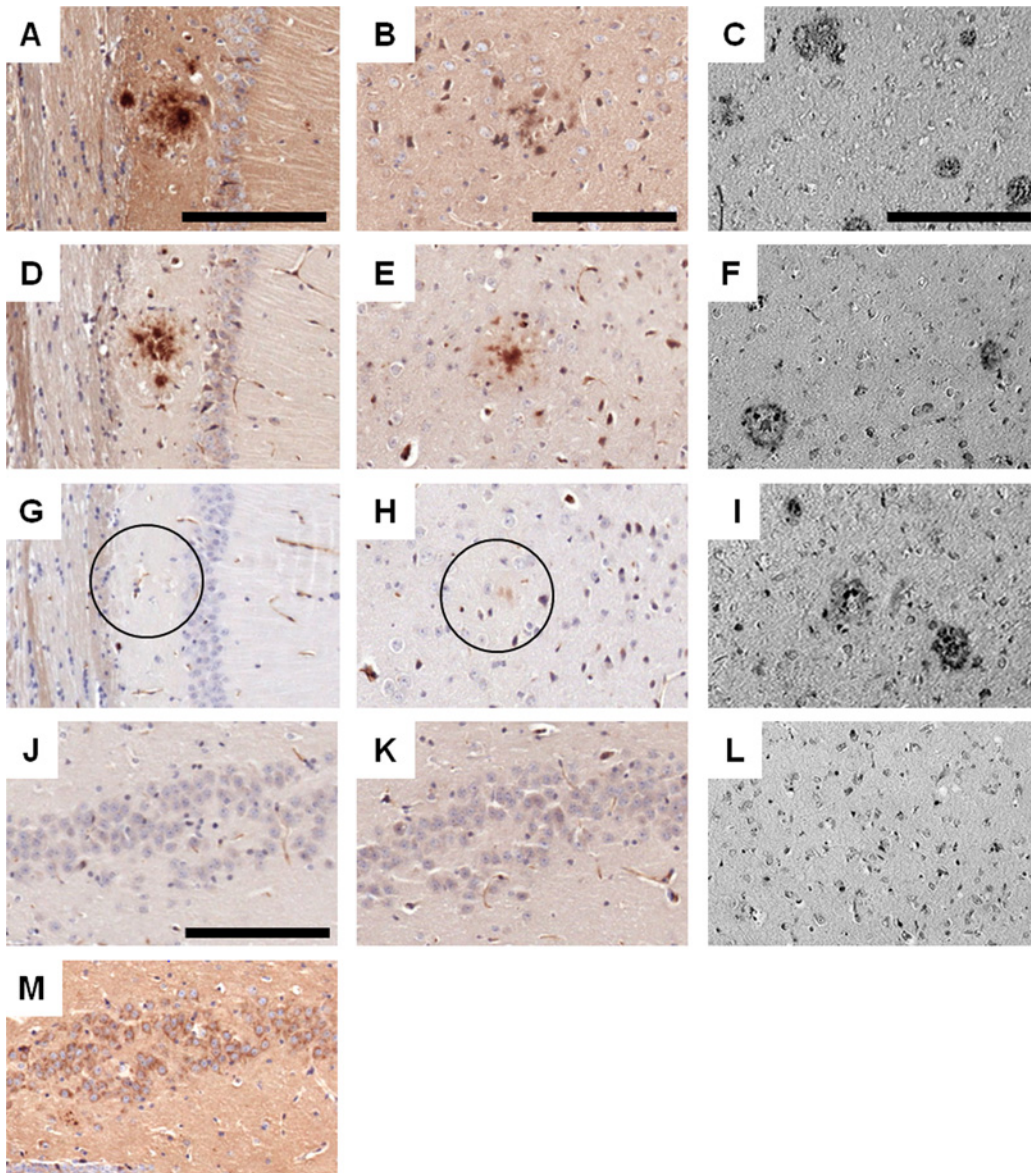

**Figure 4. AFFITOPE-induced antibodies detect amyloid deposits but spare neuronal APP on murine and human brain sections.** Sections prepared from the hippocampus (A, D, G, J, K, M) and the cortex (B, E, H), of a 12 month old Tg2576 mouse were incubated with plasma of AD01- (D, J) or AD02-treated mice (E, K) and, for control purposes, with the antibodies 6E10 (A+B) and mAb 22C11 (J, K, M), recognizing A $\beta$  and full length APP. G) and H) show a loss of immunoreactivity on Tg2576 brain sections incubated with AD01- and AD02-induced samples which were mixed with the respective AFFITOPE peptide to inhibit AFFITOPE specific staining (i.e. G: AD01-induced plasma + 10 $\mu$ M AD01 peptide, H: AD02-induced plasma + 10 $\mu$ M AD02 peptide). Sections prepared from the cortex of a female AD patient (C, F, I, L Braak stage VI,) were incubated with the A $\beta$  specific control antibody BAM10 (C), AD01- (F) and AD02-induced plasma (I) or plasma from naïve control mice as negative control (L). Binding of the Abs was detected using a standard DAB immunohistochemistry protocol. The analysis of human sections reveals a specific amyloid deposit staining of AD01- (F) and AD02-induced Abs (I) present in murine plasma similar to staining obtained by using control antibody BAM10 (C), whereas no staining was detectable with plasma derived from a naïve, untreated animal (L). Pictures were taken at a magnification of 20x. Scale bars: 200 $\mu$ m; circles in G and H indicate amyloid deposits devoid of amyloid specific staining by AD01- or AD02- induced antibodies following peptide-specific competition.

doi:10.1371/journal.pone.0115237.g004

and AD02-induced Abs (Fig. 4I) present in murine plasma similar to staining obtained by using control antibody BAM10 (Fig. 4C). No staining was detectable with plasma derived from a naïve, untreated animal (Fig. 4L). These findings corroborated the A $\beta$ -specificity described above characterized by the lack of APP cross-reactivity (Fig. 2).

## AFFITOPE vaccination does not activate A $\beta$ -specific T-cells

AD01 and AD02 are 7 amino acids long (6 containing the mimicry information +1 residue used for conjugation). Therefore, these AFFITOPE peptides should be too short to bind to MHC molecules and activate peptide specific T-cells. In addition, their amino acid sequences differ from the one of the N-terminus of A $\beta$ . To formally test whether conjugate vaccines containing AFFITOPES AD01 and AD02 would activate AFFITOPE-peptide or A $\beta$ -specific T-cells, splenocytes of immunized, non-transgenic animals were analyzed by ELISPOT. To this end, groups of  $n = 6$  C56BL/6 mice were immunized 3 times at 2 week-intervals with AD01-KLH, AD02-KLH or ovalbumin (OVA). One week after the last immunization, splenocytes were isolated and stimulated *in vitro* with the carrier (KLH), A $\beta$  or ovalbumin-derived MHC class I- (IFN $\gamma$  assay) and MHC class II (IL-4 assay) binding peptides. Cultures were assessed for IL-4- and IFN $\gamma$ -producing cells, which, given the stimulation conditions, reflect T-lymphocytes that had been primed during vaccination. Assay controls included stimulation with PMA/ionomycin (IL-4 assay) and concanavalin A (IFN $\gamma$  assay) and confirmed cell viability/functionality (Fig. 5A and B). Restimulation with the carrier protein demonstrated that both AFFITOPE vaccines had led to the induction of a KLH-specific T-cell response. Such a response was not evident in OVA-immunized animals. However, *in vitro* stimulation of splenocytes derived from AD01 and AD02-immunized animals with either AD01- or AD02-peptides as well as with recombinant A $\beta$  did not yield a signal over background confirming the expected inability of the two AFFITOPES of activating either AFFITOPE peptide- as well as A $\beta$ -specific T-cells. This view is supported by experimental evidence from transgenic animals undergoing active immunotherapy using AD01 and AD02: To test whether AD01 and AD02 immunotherapy would lead to brain infiltration of T-cells, brain sections of  $n = 20$  AD02-immunized-,  $n = 9$  AD01-immunized-, and  $n = 10$  carrier-treated Tg2576 mice were subjected to immunohistochemical examination using CD3 specific antibodies to detect potential CD3+ T cells (see Appendix, S3 Fig.). Despite that fact that in most of the AD01- and AD02- treated animals immunisation had resulted in a reduction of amyloid deposition (see Fig. 6 and 7), none of the brains was found to be infiltrated by CD3+ T cells.

## Both vaccine candidates lower cerebral A $\beta$ without triggering cerebral amyloid angiopathy (CAA) or micro-hemorrhages (MH)

To test whether AD01 and AD02 would lower cerebral amyloid load, groups of 6-months old Tg2576-mice ( $n = 10$ /group) were vaccinated 6x at monthly intervals with either vaccine (independent experiments), and sacrificed at 14 months of age. Their brains were assessed for diffuse and dense-cored plaques by IF-staining using monoclonal antibody 3A5. Cortical as well as hippocampal sections of KLH/ALUM-injected controls were covered by numerous amyloid plaques. They covered on average 2.00% (AD01 experiment) and 0.69% (AD02 experiment) of the area analyzed. By contrast, respective brain areas of AD01- and AD02-immunized Tg2576-mice contained significantly less deposits (Fig. 6A-D) covering 0.21% (Fig. 6E) and 0.77% (Fig. 6F), respectively. Thus, AD01 reduced the area covered by amyloid by 62% ( $p < 0.05$ ) and AD02 by 70% ( $p < 0.05$ ).

In addition to the analysis of amyloid deposition *in situ* we also assessed the effect of AFFITOPE vaccination on the cerebral level of A $\beta$ 1-40 and A $\beta$ 1-42 by peptide ELISA. Therefore, brain samples of AD01 and AD02 treated Tg2576 animals were extracted and soluble and insoluble brain fractions were subjected to Human A $\beta$ 40 and Human A $\beta$ 42 ELISA (EMD-Milipore, USA) analysis. Neither AD01 nor AD02 treated animals showed a significant change of soluble A $\beta$ 1-40 and A $\beta$ 1-42 following immunotherapy (see Fig. 7A and B). In contrast for both vaccines, insoluble A $\beta$  was reduced significantly following immunotherapy (see Fig. 7C



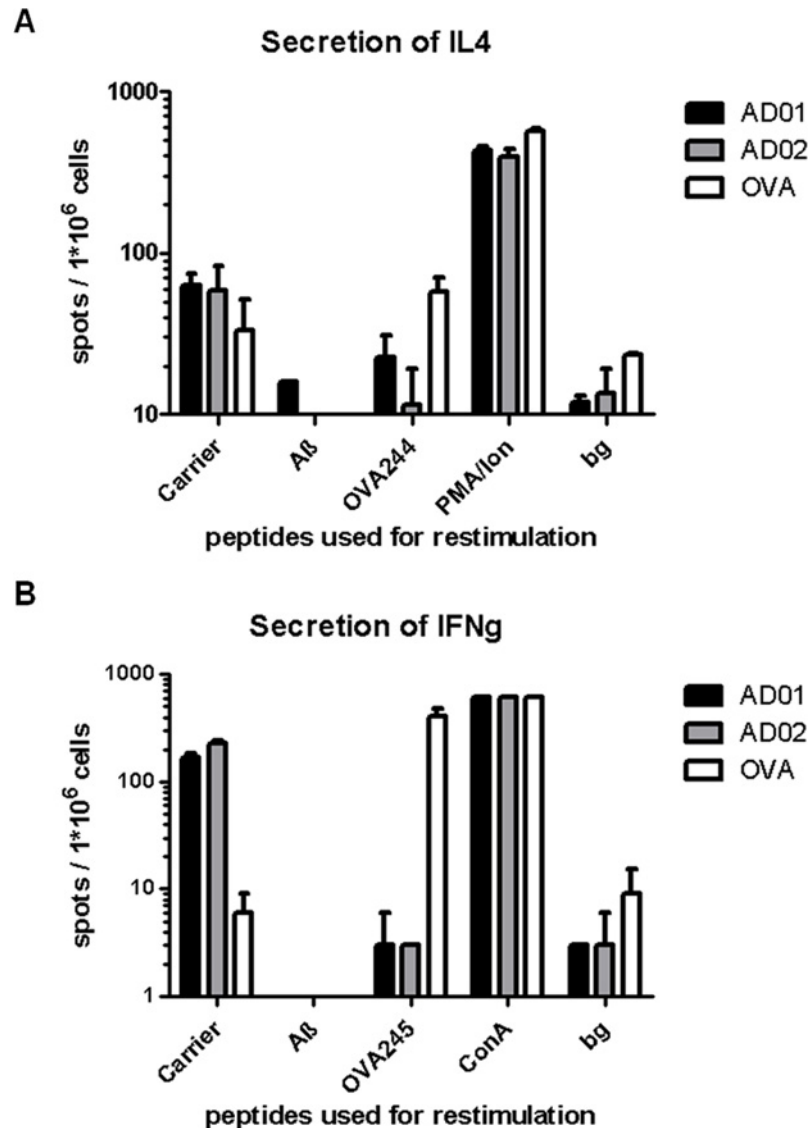

**Figure 5. AD01 and AD02 immunization does not induce self-reactive T-Cells.** Neither AD01 nor AD02 treated mice showed any sign of Aβ-specific T-cell activation in two ELISPOT assays (A+B). Re-stimulation using the carrier (KLH) was resulting in a stimulation of IL4 and Interferon gamma (IFNγ) secretion, indicative of the presence of carrier specific T-cells following immunization with AD01 and AD02. The positive control Ovalbumin was able to induce a slightly higher Interferon gamma secretion than the carrier used in the AFFITOPE vaccines (B). A+B depict two representative ELISPOT analyses following vaccination of Ovalbumin, AD01 and AD02. A) IL4 secretion following splenocyte restimulation using carrier (KLH) and Aβ compared to the controls OVA244 (TEWTSSNVMEERKIKV; MHC class II restricted to demonstrate Ovalbumin induced T-cells) and PMA/ionomycin (PMA/Ion); B) IFNγ secretion following splenocyte restimulation compared to the positive controls OVA245 (SIINFEKL; MHC class I restricted to demonstrate Ovalbumin induced T-cells) and Concavalin A (ConA). Bg describes the background of secretion in non-stimulated cells in this assay. Numbers are the total number of spots per million of cells seeded on the ELISPOT plates.

doi:10.1371/journal.pone.0115237.g005

and D). For AD02 a 60% reduction of Aβ1-40 ( $p < 0.05$ ) and a 62% ( $p = 0.056$ ) reduction of Aβ1-42 could be detected. AD01 showed a reduction of 69% (Aβ1-40,  $p < 0.05$ ) and 78% (Aβ1-42,  $p < 0.01$ ), respectively. This differences are most probably reflecting a selective removal of aggregated and deposited Aβ while soluble forms were only reduced to a low amount.



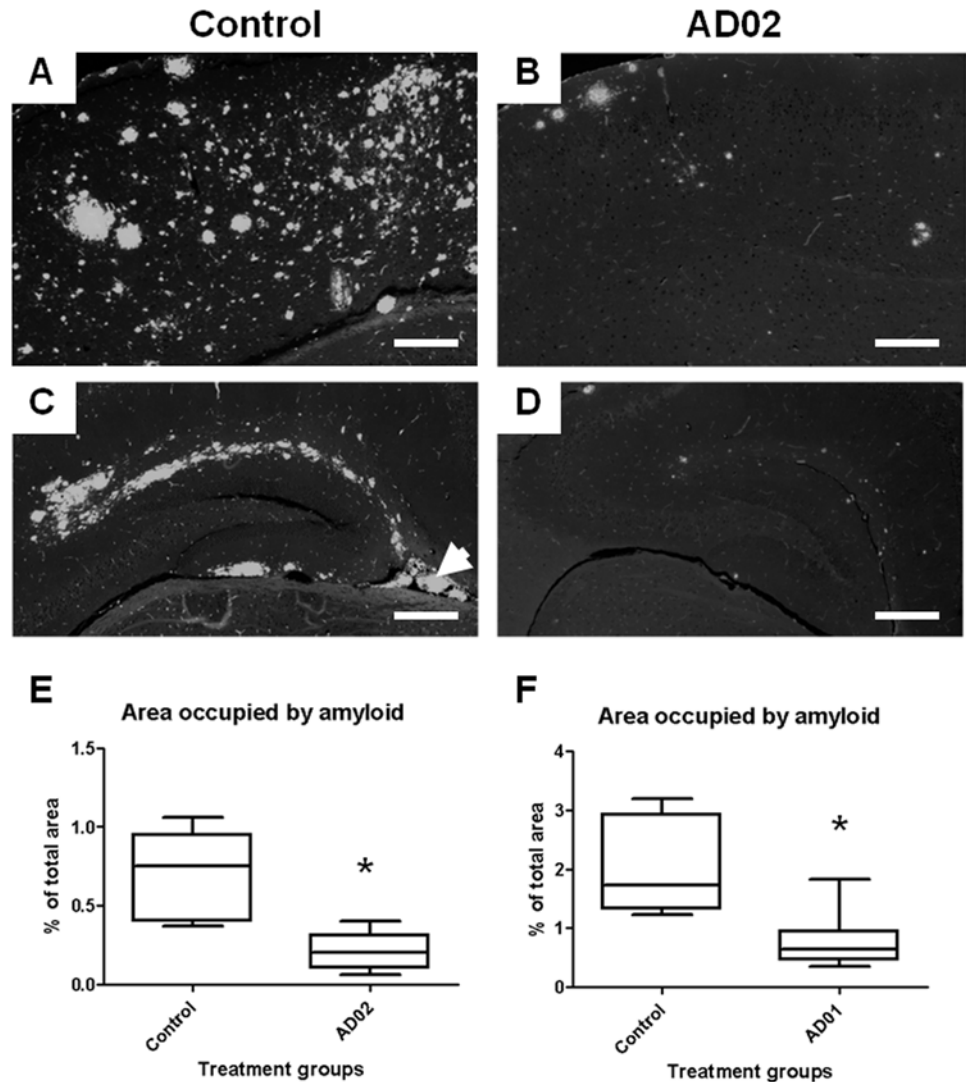

**Figure 6. AFFITOPE immunization reduces cerebral amyloid deposition in Tg2576 mice.** Groups of Tg2576 mice ( $n = 10/\text{group}$ ) received 6 monthly injections of KLH/ALUM or AD01-, AD02-conjugate vaccines. Brains were isolated, 8 weeks after the 6<sup>th</sup> immunization. Quantification of the relative total brain area covered by amyloid deposits (in % of total tissue analyzed) is based on immuno-fluorescence staining using the A $\beta$  specific mAb 3A5. Representative subregions of the cortex (A, B) and dentate gyrus (C, D) of controls (A, C) and AD02- (B, D) immunized mice are shown. E) AD02-vaccination reduces the relative area covered by amyloid deposits compared to controls by 70% (diffuse and dense cored amyloid;  $p < 0.05$ ). F) AD01 vaccination reduces the relative area covered by amyloid deposits compared to controls by 62% (diffuse and dense cored amyloid;  $p < 0.05$ ). Box plots in E and F show minimum, 25% percentile, median, 75% percentile and maximum. Asterisks in E+F indicate statistical significant difference ( $p < 0.05$ ); Arrowhead in C indicates unspecific fluorescence from a cerebral vessel. Scale bar: 200 $\mu\text{M}$ ; pictures taken at 10x magnification

doi:10.1371/journal.pone.0115237.g006

As amyloid removal appears to partially occur via the vasculature and peripheral sink mechanisms [31, 32, 33] and can be associated with enhanced micro-bleedings following active and passive immunotherapy [34], blood-vessels of relevant brain regions (cortex and hippocampus) were analyzed for their amyloid content by 3A5 staining and the same regions were assessed for microbleedings by Prussian Blue staining, respectively. At the time point assessed, the number of 3A5-positive vessels per  $\text{mm}^2$  is comparable for control- and AFFITOPE-treated

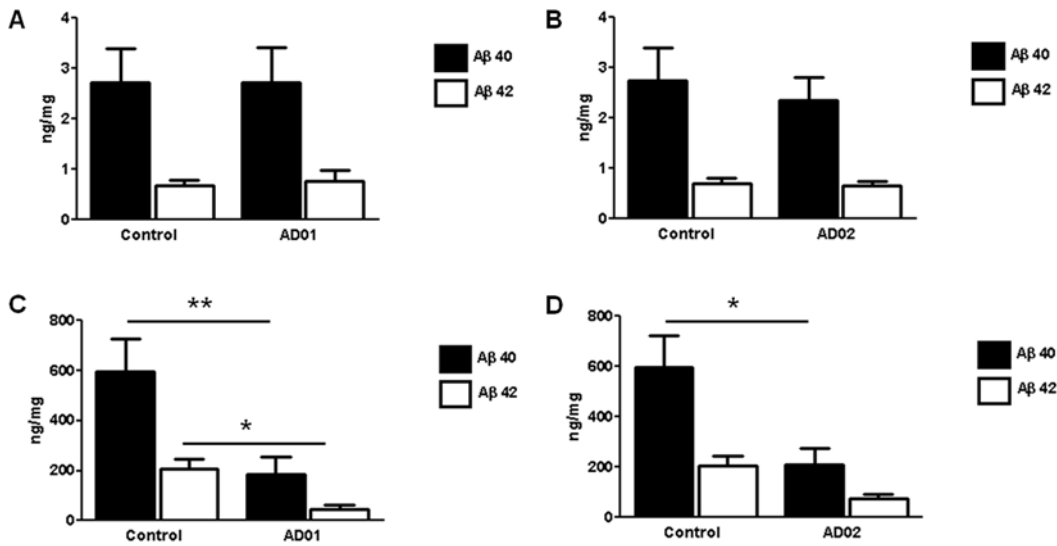

**Figure 7. AFFITOPE immunization reduces cerebral amyloid levels in Tg2576 mice (ELISA).** Groups of Tg2576 mice ( $n = 10/\text{group}$ ) received 6 monthly injections of KLH/ALUM or AD01-, AD02-conjugate vaccines. Brains were isolated, 8 weeks after the 6<sup>th</sup> immunization, extracted and soluble and insoluble brain fractions were subjected to Human A $\beta$ 40 and Human A $\beta$ 42 ELISA (EMD-Milipore, USA) analysis. Neither AD01- (A) nor AD02 treated animals (B) showed a significant change of soluble A $\beta$ 1-40 and A $\beta$ 1-42 following immunotherapy as compared to control immunized animals. Insoluble A $\beta$  was reduced significantly following immunotherapy. C) AD01 treated animals showed a 69% reduction of A $\beta$ 1-40 levels ( $p = 0.005$ ) and a 78% reduction of A $\beta$ 1-42 ( $p = 0.015$ ), respectively. D) For AD02 a 60% reduction of A $\beta$ 1-40 ( $p = 0.033$ ) and a 62% ( $p = 0.056$ ) reduction of A $\beta$ 1-42 could be detected. Results are expressed as average  $\pm$  SEM and are given as ng/mg total protein. Black bars represent A $\beta$ 1-40 and white bars represent A $\beta$ 1-42 values. Asterisks in C+D indicate statistical significant difference (\*... $p < 0.05$ , \*\*... $p < 0.01$ );

doi:10.1371/journal.pone.0115237.g007

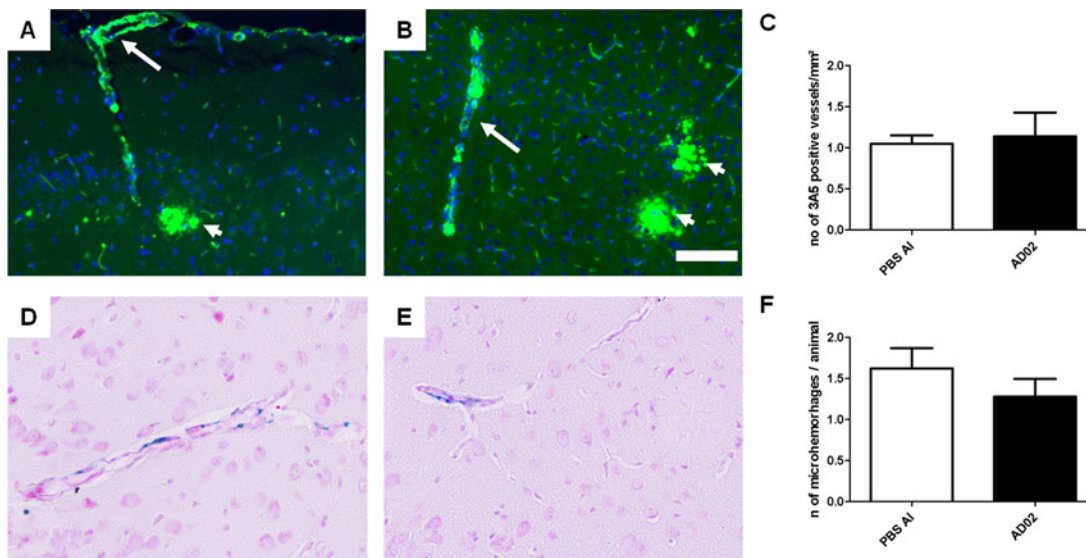

**Figure 8. Cerebral amyloid angiopathy and microhemorrhaging are unchanged following AFFITOPE-immunization.** The analysis of the incidence of amyloid bearing vessel in AFFITOPE- and control treated animals by assessing 3A5 staining in cerebral vessels reveals no significant differences (A-C). A) Example from a cortical section of a control animal. B) Example from a cortical section of an AD02-treated animal. C) Quantitative analysis demonstrating the average number of 3A5 positive vessels/mm<sup>2</sup> (avg.  $\pm$  SEM) in control ( $n = 9$ ), and AD02-treated animals ( $n = 8$ ). The analysis of the incidence of cerebral micro-hemorrhages in these animals by assessing Hemociderin staining (= Prussian Blue) did not show significant differences at 14 months of age (D-F). D) Example from a cortical section of a control animal. E) Example from a cortical section of an AD02-treated animal. F) quantitative analysis demonstrating the average number of Hemociderin positive vessels/animal in control ( $n = 9$ ), and AD02 treated animals ( $n = 8$ , respectively); Arrows indicate 3A5 positive vessels, arrowheads indicate amyloid deposits. Scale bar: 50 $\mu\text{m}$ ; pictures taken at 20x magnification

doi:10.1371/journal.pone.0115237.g008

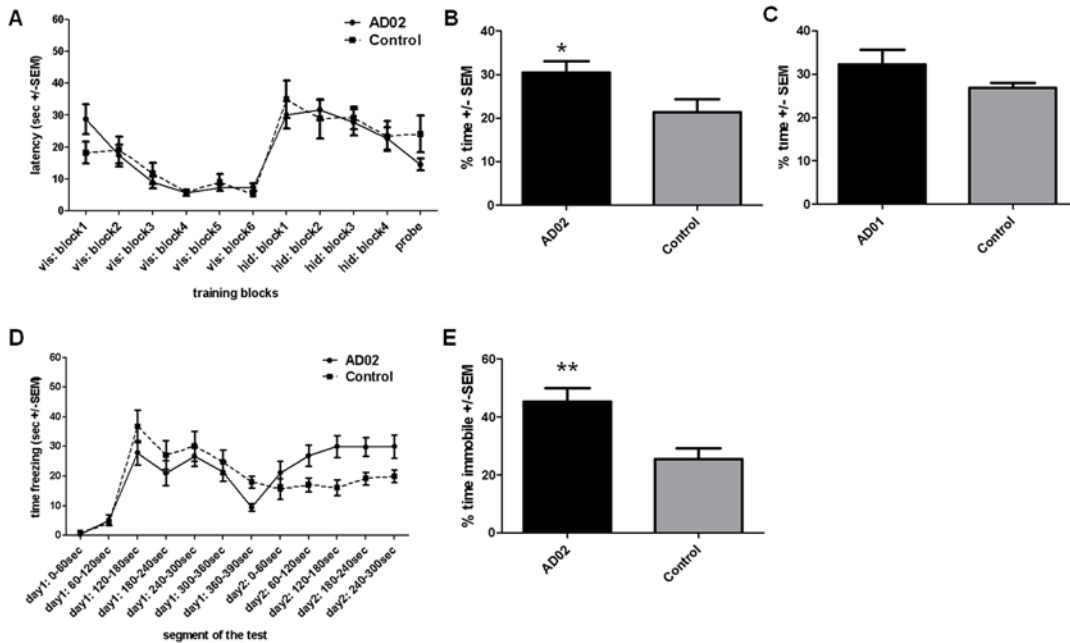

**Figure 9. AFFITOPE vaccination improves cognitive function of Tg2576-mice.** Spatial memory and learning were assessed with MWM (A-C), contextual learning and memory with CFC (D-E). Cognitive testing was initiated 4 weeks prior to sacrifice in groups of AFFITOPE-immunized or Tg2576 control mice. A) Learning curves as assessed by escape latency for visible as well as hidden platform training. Both groups exhibited comparable learning capacities. B) Spatial memory assessed by probe trial using % of time spent in target quadrant at the end of MWM. AD02 vaccination improves spatial memory by 40% ( $p < 0.05$ ). Similar results were obtained for distance travelled (not shown). C) Spatial memory assessed by probe trial using time spent in target quadrant at the end of MWM. AD01 vaccination increases the time spent in the target quadrant by 25% ( $n = 5$  animals/group;  $p = 0.1$ ). D) Development of the time freezing on day 1 and day 2 of the CFC-analysis revealed that AD02-treated animals show slightly lower freezing levels in response to foot shocks on day 1 ( $p > 0.05$ ), but froze significantly longer during the retention phase of the CFC test at day 2 ( $p < 0.01$ ). E) % of time freezing at the end of CFC testing. Parameter depicted in D and E is the % of time the animals are 99% immobile during a representative 2-minute period on day two of the CFC testing paradigm. \*... $p < 0.05$ ; \*\*... $p < 0.01$ .

doi:10.1371/journal.pone.0115237.g009

animals (see Fig. 8) compatible with the view that AFFITOPE vaccines do not enhance CAA after repeated immunization. Moreover, the MH-number was low and comparable for both immunized and control mice (Fig. 8) indicating no effect on the occurrence of micro-hemorrhages following AFFITOPE immunization.

### Both vaccine candidates improve functional deficits of APP-transgenic mice

To evaluate the effect of AFFITOPE-vaccination on cognitive functions, we applied, MWM (AD01 and AD02) and CFC (AD02 only) analyzing spatial and contextual memory and learning in Tg2576-mice.

In the MWM learning phase, both AD02- and control-treated mice (receiving KLH/ALUM) showed a similar learning capability (Fig. 9A). During probe-trials for assessing memory retention, AD02-treated mice performed significantly better than control mice (Fig. 9B,  $p < 0.05$ ). No differences in swim speed between the two groups were detectable during the probe trial (data not shown). Analysing the percentage of mice per group searching in the target quadrant for  $>25\%$  of the time, showed that 82% of the AD02-treated animals were able to correctly remember the former platform position compared to 40% in the control group (data not shown). A similar MWM-analysis using AD01-treated animals revealed a similar improvement in spatial memory. However, while AD01-immunized animals performed better than controls, the effect did not reach statistical significance (Fig. 9C,  $p = 0.1$ ).

CFC demonstrated that AD02-treated mice were superior to control animals (Fig. 9D+E). Although showing slightly lower freezing levels in response to day 1 foot-shocks (Fig. 9D), animals froze significantly more on day 2 during the representative 2 min period of the retention phase of the test ( $p < 0.01$ , Fig. 9D+E). The significant improvement of AD02-treated animals was also detectable by averaging the performance in CFC during the whole 5 minutes on day 2 ( $p < 0.05$ , data not shown). Taken together, these findings demonstrate AFFITOPE-vaccination to effectively reduce memory defects in Tg2576-mice in two learning paradigms.

## Discussion

The work presented aimed at generating novel A $\beta$ -targeting AD-vaccines with specific features. Specifically, they were designed to (i) trigger Abs specific for the A $\beta$ -N-terminus (ii) being selective for aggregated A $\beta$  and (iii) preclude the activation of AFFITOPE peptide- or A $\beta$ -specific T-cells. This was accomplished via the mechanism of molecular mimicry and by applying sequential selection filters. It led to the identification of two candidates, AD01 and AD02, which fulfill the predefined criteria and exhibit disease-modifying activity in the models tested.

Molecular mimicry, in terms of humoral immunity, denotes the phenomenon of Abs not only recognizing a single epitope but more than one resembling each other and, thus, being indistinguishable for the Ab. This is not uncommon. Most examples we are aware of relate to negative effects. They include autoimmune reactions as a result of bacterial- or viral infections, neoplasias (e.g., paraneoplastic CNS disorders) or vaccination (e.g., AN1792-triggered cases of meningoencephalitis) [12, 35, 36]. We explored the possibility of exploiting molecular mimicry for the development of AD-vaccines with optimized safety- and efficacy features. To this end, Abs known to bind the A $\beta$ -N-terminus (DAEFRH), were exposed to a pool of  $10^9$  6- or 7-mer peptides. In addition to DAEFRH, a total of 68 peptides were found to bind the Abs employed (frequency of cross-reactive peptides:  $4.0 \times 10^{-8}$ ). 20.5% of the hits differed at every aa-position from the original epitope, the remaining had 2 or more aa-exchanges. For all 68 peptides, binding could be competed with DAEFRH arguing for their interaction with the antigen binding sites of the Abs. Out of the 68 peptides, 17 were picked and tested for their ability to elicit Abs when administered as peptide-KLH conjugates adjuvanted with aluminum. All 17 elicited an Ab-response to the immunizing peptide, 14 of them induced Abs reacting with A $\beta$ 1-10-BSA conjugates, which resemble to some extent A $\beta$ -aggregates given the high density of binding sites on BSA following conjugation. These data confirm and quantify the phenomenon of molecular mimicry for mAbs primarily known to bind to the A $\beta$ -N-terminus. They also demonstrate, at least for mice, that it is possible to reverse and hence exploit the process. That is, cross-reacting peptides, foreign to the human proteome, can trigger Abs that recognize the „original“ epitope and have imprinted „additional“ features, e.g. selective A $\beta$ -aggregate recognition and selective recognition of peptides derived from the same screen.

Beyond pathophysiology, design of AD-vaccines has to consider physiological functions and the dynamics of the ensuing Ab-response. While AD-pathophysiology is complex, it appears that toxicity resides within the aggregated A $\beta$  fraction affecting neurons and synapses [21, 22, 23, 24]. By contrast, monomeric A $\beta$  as well as sAPPa and APP possess physiological functions. Monomeric A $\beta$  regulates the proliferation of neural progenitors and contributes to synaptic function [17, 18, 19, 20, 37]. APP and sAPPa are involved in the development and plasticity of the nervous system, regulation of neurite outgrowth, neuronal proliferation and contribute to cognitive performance and memory [38, 39, 40, 41, 42, 43, 44, 45, 46, 47, 48, 49, 50]. Abs recognizing physiological elements of the A $\beta$ -pathway, such as the ones induced by A $\beta$ 1-6-KLH, could have negative effects via various, mutually non-exclusive mechanisms:

interference with the above molecules and their functions, Ab-triggered cytotoxicity. Moreover, APP/sAPPA and serum A $\beta$  would sequester such Abs thereby lowering their levels. Of note, the advantages of Abs with the above specificity may not be discernible in AD-models used, which are characterized by a strong over-expression of A $\beta$  and sAPPA. So far, AFFITOPE-vaccines are the first second-generation vaccines which report to spare binding to the above molecules. Other examples either do not provide any analyses on cross-reactivity [14, 15, 16] or report a lack of APP/sAPP reduction without providing data or an analysis of antibody binding other than on fixed tissue, therefore probably underestimating potential cross-reactivity in vivo [13].

Beyond differential targeting of A $\beta$ -variants, AD01 and AD02 reduced cerebral amyloid load by 62- and 70%, respectively. This compares favorably to conventional vaccines [13, 14, 15, 16, 51]. In addition to the IF analysis, assessing the amount of insoluble A $\beta$  showed a selective and significant reduction following AD01 and AD02 immunotherapy, whereas soluble forms of A $\beta$ 1-40 and A $\beta$ 1-42 were not significantly changed. This selective removal of insoluble and deposited A $\beta$  could further support the selectivity of AFFITOPE-vaccines for A $\beta$ -aggregates.

Amyloid reduction was not associated with an increase in detectable MH or CAA, as seen with other vaccines [52, 53], but with improvement of cognitive dysfunction as assessed by MWM and CFC. Furthermore, we could also demonstrate the inability of the two AFFITOPE vaccines of activating either AFFITOPE peptide- as well as A $\beta$ -specific T-cells. This is in line with similar experimental results obtained using AFFITOPE vaccines targeting alpha Synuclein (aSyn) in animal models of synucleinopathies [54]. In these experiments, no aSyn AFFITOPE peptide- or target specific T-cells (i.e. alpha Synuclein) could be detected by ELISPOT- or immunohistochemical analyses following active immunotherapy in mice using peptide conjugate vaccines [54].

In conclusion, data presented support the feasibility of the proposed technology based on molecular mimicry. Vaccine candidates identified, AFFITOPes AD01 and AD02, exhibit high specificity (A $\beta$ -aggregates but no monomers) defining their high safety (e.g., sparing of APP/sAPPA-recognition) and efficacy profiles. Given their disease-modifying potential both have been introduced to clinical testing in mild to moderate AD with AD02 being currently assessed in a multicentre phase II study in early AD-patients.

## Supporting Information

**S1 Fig. Aggregation analysis of A $\beta$ -monomers,-oligomers and—fibrils.** To assess aggregation status of A $\beta$ -monomers,-oligomers and—fibrils, ThT Fluorescence analysis (A) as well as Dot blot (B) and Western blot (C) were performed. (A) Monomer preparations show relative fluorescence units (RFU) close to background indicating the absence of fibrillar A $\beta$ . Oligomeric and fibrillar preparations contained ThT positive aggregates with fibrillar preparations containing significantly more positive aggregates (RFUs >5000) than oligomeric preparations (RFUs of ca.  $\leq$ 2000). (B) Dot Blot analysis using NAB 228 showed equal signals for A $\beta$ -monomers,-oligomers and—fibrils whereas analysis using A11 did show only oligomer specific signals and failed to detect A $\beta$ -monomer and—fibril preparations indicating that only the oligomer preparations were also containing oligomeric species, not detectable in the other two preparations. (C) Western Blot analysis using NAB 228 showed equal signals for A $\beta$ -monomers and—oligomers. Oligomeric preparations contained A $\beta$ -dimers, -trimers and -tetramers as well as oligomers with a size of approx. 35–40kd (weak signal in C) in this analysis. No fibril specific signals could be detected.

(TIF)



**S2 Fig. Reactivity of AD01- and AD02-induced antibodies to A $\beta$  and sAPPa.** The reactivity of AD01- and AD02-induced Abs towards full length APP/sAPPa/APP-eGFP as well as different forms of A $\beta$  was assessed by Western blot analysis (A+B). Specificity of AFFITOPE-induced antibodies for aggregated A $\beta$  was assessed by competition ELISA (C). A) Western blot analysis using brain extracts from a 12 month old female Tg2576 mouse and from CHO cells stably expressing a human APP-eGFP fusion protein showed a lack of reactivity of AD01- and AD02- induced antibodies against full length APP/sAPPa and APP-eGFP fusion protein whereas the positive control antibody 22C11 (APP-specific) was able to detect APP/sAPPa and APP-eGFP, respectively. B) Western Blot analysis of aggregated recombinant A $\beta$  revealed a lack of reactivity of AD02-induced Abs against monomeric and dimeric A $\beta$  as well as low molecular weight (MW) A $\beta$  aggregates (<100kD). AD02-induced Abs react predominantly against high MW A $\beta$  aggregates (>100kD). AD01 induced antibodies, as the non-conformer specific antibody 4G8 showed binding to A $\beta$ -monomers,—dimers, as well as low and MW A $\beta$  aggregates. C) ELISA experiment demonstrating the selectivity of AD01- and AD02- induced antibodies for aggregated A $\beta$  by concentration dependent, specific competition using aggregated A $\beta$ . Bars represent the means of OD values (at 405nm) of individual samples derived from single animals immunized with AD01 or AD02. Reactivity of sera was tested against aggregated A $\beta$ 1-42 immobilised on ELISA plates (1 $\mu$ M). Competition was done using plasma samples (dilution of 1/100) and aggregate concentrations of 0.5 $\mu$ g/ml and 1 $\mu$ g/ml, respectively. A: 1. . .Tg2576 brain extract; 2. . .CHO APP-eGFP cell extract; B: m+d. . .A $\beta$  monomer and dimer, l+h. . .low and high MW A $\beta$  aggregates; C: sec. only. . . secondary antibody used as background control for the ELISA; grey and black bars indicate OD values for AD01 (grey) and AD02 (black) induced antibodies (+/- aggregated A $\beta$ ) (TIF)

**S3 Fig. T-cell response to immunization with AD01 and AD02.** Immunostaining of T-cells present in the perivascular space with an anti-CD3 antibody. No CD3-positive cells were observed in brains of Control (A), AD01 (B) or AD02 (C) immunized animals. CD3 positive cells could be detected in murine splenic tissue sections used as positive controls for staining (D). Pictures in A-C show CA1 region of brains from 14 month old Tg2576 animals undergoing immunotherapy. Per mouse, a total of  $\leq$ 20 individual brain sections were assessed. Scale bar = 50  $\mu$ m, pictures taken at a 20x magnification. (TIF)

**S1 Appendix. Materials And Methods.**  
(DOCX)

## Acknowledgments

We thank Martina-Anna Gschirtz, Michael Hierzer, Edith Kopinits, and Bea Pilz for their contribution in conduct of the experiments and Georg Mandler and Oleksandr Otava for help with statistical analyses. We also would like to thank Jan Michael Peters, for providing the pCMV-Sport 6 eGFP-FLAG plasmid used for the generation of the APP-expressing cell line. We are grateful to Arne von Bonin for critically reading the manuscript.

## Author Contributions

Responsible for study design and study conduct: MM. Contributed equally to analysis of immune reactions and pathologic assessment: MM RS. Responsible for behavior experiments: PG. Responsible for assessment of aggregate reactivity: YC SAF DW. Wrote the paper: MM AS FM WS. Responsible for study design and study conduct: MM. Contributed equally to analysis

of immune reactions and pathologic assessment: MM RS. Responsible for behavior experiments: PG. Responsible for assessment of aggregate reactivity: YC SAF DW. Critical review of the manuscript and agreement on final version: RS PG YC DP SAF DW.

## References

1. Wimo A, Prince M (2010) World Alzheimer Report 2010: The global economic impact of dementia.
2. Dubois B, Feldman HH, Jacova C, Cummings JL, Dekosky ST, et al. (2010) Revising the definition of Alzheimer's disease: a new lexicon. *Lancet Neurol* 9: 1118–1127. doi: [10.1016/S1474-4422\(10\)70223-4](https://doi.org/10.1016/S1474-4422(10)70223-4) PMID: [20934914](https://pubmed.ncbi.nlm.nih.gov/20934914/)
3. Lyketsos CG, Colenda CC, Beck C, Blank K, Doraiswamy MP, et al. (2006) Position statement of the American Association for Geriatric Psychiatry regarding principles of care for patients with dementia resulting from Alzheimer disease. *Am J Geriatr Psychiatry* 14: 561–572. doi: [10.1097/01.JGP.0000221334.65330.55](https://doi.org/10.1097/01.JGP.0000221334.65330.55) PMID: [16816009](https://pubmed.ncbi.nlm.nih.gov/16816009/)
4. Haass C, Koo EH, Mellon A, Hung AY, Selkoe DJ (1992) Targeting of cell-surface beta-amyloid precursor protein to lysosomes: alternative processing into amyloid-bearing fragments. *Nature* 357: 500–503. doi: [10.1038/357500a0](https://doi.org/10.1038/357500a0) PMID: [1608449](https://pubmed.ncbi.nlm.nih.gov/1608449/)
5. Seubert P, Vigo-Pelfrey C, Esch F, Lee M, Dovey H, et al. (1992) Isolation and quantification of soluble Alzheimer's beta-peptide from biological fluids. *Nature* 359: 325–327. doi: [10.1038/359325a0](https://doi.org/10.1038/359325a0) PMID: [1406936](https://pubmed.ncbi.nlm.nih.gov/1406936/)
6. Shoji M, Golde TE, Ghiso J, Cheung TT, Estus S, et al. (1992) Production of the Alzheimer amyloid beta protein by normal proteolytic processing. *Science* 258: 126–129. doi: [10.1126/science.1439760](https://doi.org/10.1126/science.1439760) PMID: [1439760](https://pubmed.ncbi.nlm.nih.gov/1439760/)
7. Tomic JL, Pensalfini A, Head E, Glabe CG (2009) Soluble fibrillar oligomer levels are elevated in Alzheimer's disease brain and correlate with cognitive dysfunction. *Neurobiol Dis* 35: 352–358. doi: [10.1016/j.nbd.2009.05.024](https://doi.org/10.1016/j.nbd.2009.05.024) PMID: [19523517](https://pubmed.ncbi.nlm.nih.gov/19523517/)
8. Benilova I, Karran E, De Strooper B (2012) The toxic Abeta oligomer and Alzheimer's disease: an emperor in need of clothes. *Nat Neurosci* 15: 349–357. doi: [10.1038/nn.3028](https://doi.org/10.1038/nn.3028) PMID: [22286176](https://pubmed.ncbi.nlm.nih.gov/22286176/)
9. Schneeberger A, Mandler M, Mattner F, Schmidt W. (2010) AFFITOME(R) technology in neurodegenerative diseases: the doubling advantage. *Hum Vaccin* 6: 948–952. doi: [10.4161/hv.6.11.13217](https://doi.org/10.4161/hv.6.11.13217) PMID: [20980801](https://pubmed.ncbi.nlm.nih.gov/20980801/)
10. Le Poole IC, Luiten RM (2008) Autoimmune etiology of generalized vitiligo. *Curr Dir Autoimmun* 10: 227–243. doi: [10.1159/000131485](https://doi.org/10.1159/000131485) PMID: [18460889](https://pubmed.ncbi.nlm.nih.gov/18460889/)
11. Orgogozo JM, Gilman S, Dartigues JF, Laurent B, Puel M, et al. (2003) Subacute meningoencephalitis in a subset of patients with AD after Abeta42 immunization. *Neurology* 61: 46–54. doi: [10.1212/01.WNL.0000073623.84147.A8](https://doi.org/10.1212/01.WNL.0000073623.84147.A8) PMID: [12847155](https://pubmed.ncbi.nlm.nih.gov/12847155/)
12. Rosenfeld MR, Dalmau J. (2010) Update on paraneoplastic and autoimmune disorders of the central nervous system. *Semin Neurol* 30: 320–331. doi: [10.1055/s-0030-1255223](https://doi.org/10.1055/s-0030-1255223) PMID: [20577938](https://pubmed.ncbi.nlm.nih.gov/20577938/)
13. Wiessner C, Wiederhold KH, Tissot AC, Frey P, Danner S, et al. (2011) The second-generation active Abeta immunotherapy CAD106 reduces amyloid accumulation in APP transgenic mice while minimizing potential side effects. *J Neurosci* 31: 9323–9331. doi: [10.1523/JNEUROSCI.0293-11.2011](https://doi.org/10.1523/JNEUROSCI.0293-11.2011) PMID: [21697382](https://pubmed.ncbi.nlm.nih.gov/21697382/)
14. Muhs A, Hickman DT, Pihlgren M, Chuard N, Giriens V, et al. (2007) Liposomal vaccines with conformation-specific amyloid peptide antigens define immune response and efficacy in APP transgenic mice. *Proc Natl Acad Sci U S A* 104: 9810–9815. doi: [10.1073/pnas.0703137104](https://doi.org/10.1073/pnas.0703137104) PMID: [17517595](https://pubmed.ncbi.nlm.nih.gov/17517595/)
15. Wang CY, Finstad CL, Walfield AM, Sia C, Sokoll KK, et al. (2007) Site-specific UB1th amyloid-beta vaccine for immunotherapy of Alzheimer's disease. *Vaccine* 25: 3041–3052. doi: [10.1016/j.vaccine.2007.01.031](https://doi.org/10.1016/j.vaccine.2007.01.031) PMID: [17287052](https://pubmed.ncbi.nlm.nih.gov/17287052/)
16. Liu B, Frost JL, Sun J, Fu H, Grimes S, et al. (2013) MER5101, a novel Abeta1-15:DT conjugate vaccine, generates a robust anti-Abeta antibody response and attenuates Abeta pathology and cognitive deficits in APP<sup>swe</sup>/PS1<sup>DeltaE9</sup> transgenic mice. *J Neurosci* 33: 7027–7037. doi: [10.1523/JNEUROSCI.5924-12.2013](https://doi.org/10.1523/JNEUROSCI.5924-12.2013) PMID: [23595760](https://pubmed.ncbi.nlm.nih.gov/23595760/)
17. Giuffrida ML, Caraci F, Pignataro B, Cataldo S, De Bona P, et al. (2009) Beta-amyloid monomers are neuroprotective. *J Neurosci* 29: 10582–10587. doi: [10.1523/JNEUROSCI.1736-09.2009](https://doi.org/10.1523/JNEUROSCI.1736-09.2009) PMID: [19710311](https://pubmed.ncbi.nlm.nih.gov/19710311/)
18. Chen Y, Dong C (2009) Abeta40 promotes neuronal cell fate in neural progenitor cells. *Cell Death Differ* 16: 386–394. doi: [10.1038/cdd.2008.94](https://doi.org/10.1038/cdd.2008.94) PMID: [18566600](https://pubmed.ncbi.nlm.nih.gov/18566600/)
19. Kamenetz F, Tomita T, Hsieh H, Seabrook G, Borchelt D, et al. (2003) APP processing and synaptic function. *Neuron* 37: 925–937. doi: [10.1016/S0896-6273\(03\)00124-7](https://doi.org/10.1016/S0896-6273(03)00124-7) PMID: [12670422](https://pubmed.ncbi.nlm.nih.gov/12670422/)

20. Sotthibundhu A, Li QX, Thangnipon W, Coulson EJ (2009) Abeta(1–42) stimulates adult SVZ neurogenesis through the p75 neurotrophin receptor. *Neurobiol Aging* 30: 1975–1985. doi: [10.1016/j.neurobiolaging.2008.02.004](https://doi.org/10.1016/j.neurobiolaging.2008.02.004) PMID: [18374455](https://pubmed.ncbi.nlm.nih.gov/18374455/)
21. Freir DB, Fedriani R, Scully D, Smith IM, Selkoe DJ, et al. (2011) Abeta oligomers inhibit synapse remodelling necessary for memory consolidation. *Neurobiol Aging* 32: 2211–2218. doi: [10.1016/j.neurobiolaging.2010.01.001](https://doi.org/10.1016/j.neurobiolaging.2010.01.001) PMID: [20097446](https://pubmed.ncbi.nlm.nih.gov/20097446/)
22. Hartley DM, Walsh DM, Ye CP, Diehl T, Vasquez S, et al. (1999) Protofibrillar intermediates of amyloid beta-protein induce acute electrophysiological changes and progressive neurotoxicity in cortical neurons. *J Neurosci* 19: 8876–8884. PMID: [10516307](https://pubmed.ncbi.nlm.nih.gov/10516307/)
23. Mucke L, Selkoe DJ (2012) Neurotoxicity of amyloid beta-protein: synaptic and network dysfunction. *Cold Spring Harb Perspect Med* 2: a006338. PMID: [22762015](https://pubmed.ncbi.nlm.nih.gov/22762015/)
24. Reed MN, Hofmeister JJ, Jungbauer L, Welzel AT, Yu C, et al. (2011) Cognitive effects of cell-derived and synthetically derived Abeta oligomers. *Neurobiol Aging* 32: 1784–1794. doi: [10.1016/j.neurobiolaging.2009.11.007](https://doi.org/10.1016/j.neurobiolaging.2009.11.007) PMID: [20031278](https://pubmed.ncbi.nlm.nih.gov/20031278/)
25. Rogers DC, Jones DN, Nelson PR, Jones CM, Quilter CA, et al. (1999) Use of SHIRPA and discriminant analysis to characterise marked differences in the behavioural phenotype of six inbred mouse strains. *Behav Brain Res* 105: 207–217. doi: [10.1016/S0166-4328\(99\)00072-8](https://doi.org/10.1016/S0166-4328(99)00072-8) PMID: [10563494](https://pubmed.ncbi.nlm.nih.gov/10563494/)
26. Mandler M, Rockenstein E, Ubhi K, Hansen L, Adame A, et al. (2012) Detection of peri-synaptic amyloid-beta pyroglutamate aggregates in early stages of Alzheimer's disease and in AbetaPP transgenic mice using a novel monoclonal antibody. *J Alzheimers Dis* 28: 783–794. PMID: [22064070](https://pubmed.ncbi.nlm.nih.gov/22064070/)
27. Johansson AS, Berglind-Dehlin F, Karlsson G, Edwards K, Gellerfors P, et al. (2006) Physicochemical characterization of the Alzheimer's disease-related peptides A beta 1–42Arctic and A beta 1–42wt. *FEBS J* 273: 2618–2630. doi: [10.1111/j.1742-4658.2006.05263.x](https://doi.org/10.1111/j.1742-4658.2006.05263.x) PMID: [16817891](https://pubmed.ncbi.nlm.nih.gov/16817891/)
28. Morris R (1984) Developments of a water-maze procedure for studying spatial learning in the rat. *J Neurosci Methods* 11: 47–60. doi: [10.1016/0165-0270\(84\)90007-4](https://doi.org/10.1016/0165-0270(84)90007-4) PMID: [6471907](https://pubmed.ncbi.nlm.nih.gov/6471907/)
29. Comery TA, Martone RL, Aschmies S, Atchison KP, Diamantidis G, et al. (2005) Acute gamma-secretase inhibition improves contextual fear conditioning in the Tg2576 mouse model of Alzheimer's disease. *J Neurosci* 25: 8898–8902. doi: [10.1523/JNEUROSCI.2693-05.2005](https://doi.org/10.1523/JNEUROSCI.2693-05.2005) PMID: [16192379](https://pubmed.ncbi.nlm.nih.gov/16192379/)
30. Hock C, Konietzko U, Streffer JR, Tracy J, Signorell A, et al. (2003) Antibodies against beta-amyloid slow cognitive decline in Alzheimer's disease. *Neuron* 38: 547–554. doi: [10.1016/S0896-6273\(03\)00294-0](https://doi.org/10.1016/S0896-6273(03)00294-0) PMID: [12765607](https://pubmed.ncbi.nlm.nih.gov/12765607/)
31. DeMattos RB, Bales KR, Cummins DJ, Dodart JC, Paul SM, et al. (2001) Peripheral anti-A beta antibody alters CNS and plasma A beta clearance and decreases brain A beta burden in a mouse model of Alzheimer's disease. *Proc Natl Acad Sci U S A* 98: 8850–8855. doi: [10.1073/pnas.151261398](https://doi.org/10.1073/pnas.151261398) PMID: [11438712](https://pubmed.ncbi.nlm.nih.gov/11438712/)
32. DeMattos RB, Bales KR, Cummins DJ, Paul SM, Holtzman DM (2002) Brain to plasma amyloid-beta efflux: a measure of brain amyloid burden in a mouse model of Alzheimer's disease. *Science* 295: 2264–2267. doi: [10.1126/science.1067568](https://doi.org/10.1126/science.1067568) PMID: [11910111](https://pubmed.ncbi.nlm.nih.gov/11910111/)
33. Lemere CA, Spooner ET, LaFrancois J, Malester B, Mori C, et al. (2003) Evidence for peripheral clearance of cerebral Abeta protein following chronic, active Abeta immunization in PSAPP mice. *Neurobiol Dis* 14: 10–18. doi: [10.1016/S0969-9961\(03\)00044-5](https://doi.org/10.1016/S0969-9961(03)00044-5) PMID: [13678662](https://pubmed.ncbi.nlm.nih.gov/13678662/)
34. Wilcock DM, Colton CA (2009) Immunotherapy, vascular pathology, and microhemorrhages in transgenic mice. *CNS Neurol Disord Drug Targets* 8: 50–64. doi: [10.2174/187152709787601858](https://doi.org/10.2174/187152709787601858) PMID: [19275636](https://pubmed.ncbi.nlm.nih.gov/19275636/)
35. Oyarbide-Valencia K, van den Boorn JG, Denman CJ, Li M, Carlson JM, et al. (2006) Therapeutic implications of autoimmune vitiligo T cells. *Autoimmun Rev* 5: 486–492. doi: [10.1016/j.autrev.2006.03.012](https://doi.org/10.1016/j.autrev.2006.03.012) PMID: [16920575](https://pubmed.ncbi.nlm.nih.gov/16920575/)
36. Fujinami RS, von Herrath MG, Christen U, Whitton JL (2006) Molecular mimicry, bystander activation, or viral persistence: infections and autoimmune disease. *Clin Microbiol Rev* 19: 80–94. doi: [10.1128/CMR.19.1.80-94.2006](https://doi.org/10.1128/CMR.19.1.80-94.2006) PMID: [16418524](https://pubmed.ncbi.nlm.nih.gov/16418524/)
37. Yankner BA, Caceres A, Duffy LK (1990) Nerve growth factor potentiates the neurotoxicity of beta amyloid. *Proc Natl Acad Sci U S A* 87: 9020–9023. doi: [10.1073/pnas.87.22.9020](https://doi.org/10.1073/pnas.87.22.9020) PMID: [2174172](https://pubmed.ncbi.nlm.nih.gov/2174172/)
38. Heber S, Herms J, Gajic V, Hainfellner J, Aguzzi A, et al. (2000) Mice with combined gene knock-outs reveal essential and partially redundant functions of amyloid precursor protein family members. *J Neurosci* 20: 7951–7963. PMID: [11050115](https://pubmed.ncbi.nlm.nih.gov/11050115/)
39. Herms J, Anliker B, Heber S, Ring S, Fuhrmann M, et al. (2004) Cortical dysplasia resembling human type 2 lissencephaly in mice lacking all three APP family members. *EMBO J* 23: 4106–4115. doi: [10.1038/sj.emboj.7600390](https://doi.org/10.1038/sj.emboj.7600390) PMID: [15385965](https://pubmed.ncbi.nlm.nih.gov/15385965/)

40. Leyssen M, Ayaz D, Hebert SS, Reeve S, De Strooper B, et al. (2005) Amyloid precursor protein promotes post-developmental neurite arborization in the *Drosophila* brain. *EMBO J* 24: 2944–2955. doi: [10.1038/sj.emboj.7600757](https://doi.org/10.1038/sj.emboj.7600757) PMID: [16052209](https://pubmed.ncbi.nlm.nih.gov/16052209/)
41. Wang P, Yang G, Mosier DR, Chang P, Zaidi T, et al. (2005) Defective neuromuscular synapses in mice lacking amyloid precursor protein (APP) and APP-Like protein 2. *J Neurosci* 25: 1219–1225. doi: [10.1523/JNEUROSCI.4660-04.2005](https://doi.org/10.1523/JNEUROSCI.4660-04.2005) PMID: [15689559](https://pubmed.ncbi.nlm.nih.gov/15689559/)
42. Priller C, Bauer T, Mitteregger G, Krebs B, Kretschmar HA, et al. (2006) Synapse formation and function is modulated by the amyloid precursor protein. *J Neurosci* 26: 7212–7221. doi: [10.1523/JNEUROSCI.1450-06.2006](https://doi.org/10.1523/JNEUROSCI.1450-06.2006) PMID: [16822978](https://pubmed.ncbi.nlm.nih.gov/16822978/)
43. Hayashi Y, Kashiwagi K, Ohta J, Nakajima M, Kawashima T, et al. (1994) Alzheimer amyloid protein precursor enhances proliferation of neural stem cells from fetal rat brain. *Biochem Biophys Res Commun* 205: 936–943. doi: [10.1006/bbrc.1994.2755](https://doi.org/10.1006/bbrc.1994.2755) PMID: [7999135](https://pubmed.ncbi.nlm.nih.gov/7999135/)
44. Small DH, Nurcombe V, Reed G, Clarris H, Moir R, et al. (1994) A heparin-binding domain in the amyloid protein precursor of Alzheimer's disease is involved in the regulation of neurite outgrowth. *J Neurosci* 14: 2117–2127. PMID: [8158260](https://pubmed.ncbi.nlm.nih.gov/8158260/)
45. Ohsawa I, Takamura C, Morimoto T, Ishiguro M, Kohsaka S (1999) Amino-terminal region of secreted form of amyloid precursor protein stimulates proliferation of neural stem cells. *Eur J Neurosci* 11: 1907–1913. doi: [10.1046/j.1460-9568.1999.00601.x](https://doi.org/10.1046/j.1460-9568.1999.00601.x) PMID: [10336659](https://pubmed.ncbi.nlm.nih.gov/10336659/)
46. Caille I, Allinquant B, Dupont E, Bouillot C, Langer A, et al. (2004) Soluble form of amyloid precursor protein regulates proliferation of progenitors in the adult subventricular zone. *Development* 131: 2173–2181. doi: [10.1242/dev.01103](https://doi.org/10.1242/dev.01103) PMID: [15073156](https://pubmed.ncbi.nlm.nih.gov/15073156/)
47. Taylor CJ, Ireland DR, Ballagh I, Bourne K, Marechal NM, et al. (2008) Endogenous secreted amyloid precursor protein- $\alpha$  regulates hippocampal NMDA receptor function, long-term potentiation and spatial memory. *Neurobiol Dis* 31: 250–260. doi: [10.1016/j.nbd.2008.04.011](https://doi.org/10.1016/j.nbd.2008.04.011) PMID: [18585048](https://pubmed.ncbi.nlm.nih.gov/18585048/)
48. Ishida A, Furukawa K, Keller JN, Mattson MP (1997) Secreted form of beta-amyloid precursor protein shifts the frequency dependency for induction of LTD, and enhances LTP in hippocampal slices. *Neuroreport* 8: 2133–2137. doi: [10.1097/00001756-199707070-00009](https://doi.org/10.1097/00001756-199707070-00009) PMID: [9243598](https://pubmed.ncbi.nlm.nih.gov/9243598/)
49. Roch JM, Masliah E, Roch-Levecq AC, Sundsmo MP, Otero DA, et al. (1994) Increase of synaptic density and memory retention by a peptide representing the trophic domain of the amyloid beta/A4 protein precursor. *Proc Natl Acad Sci U S A* 91: 7450–7454. doi: [10.1073/pnas.91.16.7450](https://doi.org/10.1073/pnas.91.16.7450) PMID: [8052602](https://pubmed.ncbi.nlm.nih.gov/8052602/)
50. Meziane H, Dodart JC, Mathis C, Little S, Clemens J, et al. (1998) Memory-enhancing effects of secreted forms of the beta-amyloid precursor protein in normal and amnesic mice. *Proc Natl Acad Sci U S A* 95: 12683–12688. doi: [10.1073/pnas.95.21.12683](https://doi.org/10.1073/pnas.95.21.12683) PMID: [9770546](https://pubmed.ncbi.nlm.nih.gov/9770546/)
51. Pride M, Seubert P, Grundman M, Hagen M, Eldridge J, et al. (2008) Progress in the active immunotherapeutic approach to Alzheimer's disease: clinical investigations into AN1792-associated meningoencephalitis. *Neurodegener Dis* 5: 194–196. doi: [10.1159/000113700](https://doi.org/10.1159/000113700) PMID: [18322388](https://pubmed.ncbi.nlm.nih.gov/18322388/)
52. Wilcock DM, Gharkholonarehe N, Van Nostrand WE, Davis J, Vitek MP, et al. (2009) Amyloid reduction by amyloid-beta vaccination also reduces mouse tau pathology and protects from neuron loss in two mouse models of Alzheimer's disease. *J Neurosci* 29: 7957–7965. doi: [10.1523/JNEUROSCI.1339-09.2009](https://doi.org/10.1523/JNEUROSCI.1339-09.2009) PMID: [19553436](https://pubmed.ncbi.nlm.nih.gov/19553436/)
53. Wilcock DM, Jantzen PT, Li Q, Morgan D, Gordon MN (2007) Amyloid-beta vaccination, but not nitro-nosteroidal anti-inflammatory drug treatment, increases vascular amyloid and microhemorrhage while both reduce parenchymal amyloid. *Neuroscience* 144: 950–960. doi: [10.1016/j.neuroscience.2006.10.020](https://doi.org/10.1016/j.neuroscience.2006.10.020) PMID: [17137722](https://pubmed.ncbi.nlm.nih.gov/17137722/)
54. Mandler M, Valera E, Rockenstein E, Weninger H, Patrick C, et al. (2014) Next-generation active immunization approach for synucleinopathies: implications for Parkinson's disease clinical trials. *Acta Neuro-pathol* 127(6): 861–79. doi: [10.1007/s00401-014-1256-4](https://doi.org/10.1007/s00401-014-1256-4) PMID: [24525765](https://pubmed.ncbi.nlm.nih.gov/24525765/)
